1 **TITLE:**

2 **Native Elongation Transcript sequencing reveals temperature dependent dynamics of**  
3 **nascent RNAPII transcription in *Arabidopsis***

4

5 **AUTHORS:** Peter Kindgren<sup>#1</sup>, Maxim Ivanov<sup>#1</sup>, and Sebastian Marquardt<sup>1,\*</sup>

6

7 1. University of Copenhagen, Department of Plant and Environmental Sciences, Copenhagen  
8 Plant Science Centre, Frederiksberg, Denmark.

9

10 \* Corresponding author: [sebastian.marquardt@plen.ku.dk](mailto:sebastian.marquardt@plen.ku.dk)

11 # indicates equal contribution

12

13

14

15 **ABSTRACT**

16 Temperature profoundly affects the kinetics of biochemical reactions, yet how large molecular  
17 complexes such as the transcription machinery accommodate changing temperatures to maintain  
18 cellular function is poorly understood. Here, we developed plant native elongating transcripts  
19 sequencing (plaNET-seq) to profile genome-wide nascent RNA polymerase II (RNAPII) transcription  
20 during the cold-response of *Arabidopsis thaliana* with single-nucleotide resolution. Combined with  
21 temporal resolution, these data revealed transient genome-wide reprogramming of nascent RNAPII  
22 transcription during cold, including characteristics of RNAPII elongation and thousands of non-  
23 coding transcripts connected to gene expression. Our results suggest a role for promoter-proximal  
24 RNAPII stalling in predisposing genes for transcriptional activation during plant-environment  
25 interactions. At gene 3'-ends, cold initially facilitated transcriptional termination by limiting the  
26 distance of read-through transcription. Within gene bodies, cold reduced the kinetics of co-  
27 transcriptional splicing leading to increased intragenic stalling. Our data resolved multiple distinct  
28 mechanisms by which temperature transiently altered the dynamics of nascent RNAPII transcription  
29 and associated RNA processing, illustrating potential biotechnological solutions and future focus  
30 areas to promote food security in the context of a changing climate.

31

## 32 INTRODUCTION

33 Changes to ambient temperatures challenge the development and growth of living organisms. While  
34 mammals retain a stable body temperature, sessile organisms such as plants continually sense their  
35 environment and rely on molecular mechanisms that compensate for temperature changes(1).  
36 Alterations to the ambient temperature frequently lead to re-programming of the transcriptional  
37 output by RNA polymerase II (RNAPII) that reflects steady-state levels of messenger RNAs and non-  
38 coding RNAs in the cell(2,3). Sequence-specific transcription factors controlling the initiation of  
39 transcription often shape these responses. However, the significance of mechanisms regulating  
40 eukaryotic gene expression after initiation, for example through control of elongation of the nascent  
41 RNA chain is increasingly appreciated(4). Genome-wide profiling of transcriptionally engaged  
42 RNAPII complexes has identified low-velocity regions of RNAPII elongation at the beginning (i.e.  
43 promoter-proximal stalling) and the end (i.e. poly-(A) associated stalling) of genes(4,5). Organisms  
44 appear to alter the activity of RNAPII at these regions to re-program their transcriptional output to  
45 acclimate to temperature changes. The release from promoter-proximal stalling at heat-shock genes  
46 facilitates rapid transcriptional induction in response to heat in *Drosophila*(6), and promoter-proximal  
47 stalling is reduced genome-wide when temperatures increase in mammalian cell cultures(7). RNAPII  
48 accumulation at gene ends is associated with the mechanism of transcriptional termination(8). Here,  
49 molecular complexes associated with nascent RNAPII transcript cleavage at the poly(A)-signal  
50 (PAS) regulate RNAPII activity to ensure accurate processing of the nascent transcript(8). RNAPII  
51 continues to transcribe past the PAS until 5'-to-3' exonucleases catch up with transcribing RNAPII  
52 to mediate transcriptional termination(8-10). Hence, transcriptional termination is determined by  
53 kinetic competition between the speed of RNAPII transcription after nascent transcript cleavage and  
54 the termination factor(11). Temperature increases lengthen the read-through transcription distance  
55 at gene ends in several organisms(11,12), suggesting connections between temperature, RNAPII  
56 stalling at gene borders and the efficiency of transcriptional termination. However, the immediate  
57 genome-wide effects of low temperatures on nascent RNAPII transcription in eukaryotes are unclear.

58 Transcriptionally engaged RNAPII complexes can be visualized by Native Elongating Transcript  
59 sequencing (NET-seq)(13-16). NET-seq provides a strand-specific snapshot of nascent RNAPII  
60 transcription at single-nucleotide resolution genome-wide(16). The capture of nascent RNA by NET-  
61 seq enables the detection of RNAs that are usually subjected to co-transcriptional RNA degradation.  
62 This advantage of NET-seq helps to detect long non-coding RNAs (lncRNAs), as these tend to be  
63 targeted for co-transcriptional RNA degradation by the nuclear exosome RNA degradation  
64 complex(17,18). Moreover, NET-seq in yeast and mammals allowed estimates of the average length  
65 of cryptic read-through transcription that allows quantitative analyses of the transcription termination

66 mechanism(19,20). An additional advantage of NET-seq data are insights into co-transcriptional  
67 RNA splicing, since part of the spliceosome is co-purified with transcribing RNAPII  
68 complexes(15,21). Nascent RNAPII transcription slows down close to exon-intron boundaries in a  
69 splicing-dependent manner and is responsible for intragenic RNAPII stalling(15). Splicing regulation  
70 is essential for the cold-response in *Arabidopsis*(22,23) but how this is connected to molecular  
71 adjustments of nascent RNAPII transcription is largely unknown.

72 Here, we developed a NET-seq approach to study nascent transcription in the model plant  
73 *Arabidopsis thaliana* (plaNET-seq). We analyzed the temporal dynamics of nascent RNAPII  
74 transcription in response to cold. Our data revealed transient molecular adaptations of transcription  
75 that include changes to promoter-proximal stalling, elongation, termination and many novel non-  
76 coding transcription events overlapping gene expression domains. Our data provide genome-wide  
77 support for a transient re-programming of nascent RNAPII transcription during cold exposure,  
78 highlighting a cellular compensation mechanism at the level of nascent RNAPII transcription to assist  
79 optimal growth of multicellular organisms in challenging environments.

80

## 81 MATERIALS & METHODS

### 82 Plant material and growth conditions

83 *A. thaliana* seeds were surface-sterilized in ethanol and grown on ½ MS + 1% sucrose media in long  
84 day conditions (16 h light/8 h dark) at 22°C/18°C. Light intensity during day hours was approximately  
85 100 µE m<sup>-2</sup> s<sup>-1</sup>. 10-day old seedlings were used for all experiments. The NRPB2-FLAG line was  
86 described in(24). The construct covers a lethal *nrbp2-1* allele (SAIL\_859B04). The *fas2-4* mutant is  
87 described in(25). For inhibition of splicing, seedlings were grown on filter paper covered ½ MS + 1%  
88 sucrose for 10 days then transferred to DMSO, 5 µM pladienolide B (Santa Cruz) or 5 µM  
89 Herboxidiene (Focus Biomolecules) containing plates for 6 or 24 hours. For low temperature  
90 treatment, 10-day old seedlings were transferred to 4°C and approximately 25 µE m<sup>-2</sup> s<sup>-1</sup> for indicated  
91 times.

### 92 Total RNA isolation and RT-qPCR

93 Total RNA was isolated from Arabidopsis seedlings grown for 10 days and exposed to DMSO or  
94 splicing inhibitors for 6 or 24 hours with RNeasy Plant Mini Kit (Qiagen) according to manufacturers'  
95 instructions. 5 µg of total RNA was treated with Turbo DNaseI (Ambion) to remove any genomic  
96 DNA. Subsequently, 1 µg of DNase-treated RNA was converted to cDNA using SuperScript IV  
97 (Invitrogen) with random primers according to manufacturers' instructions. Quantitative PCR was  
98 performed in 3 technical replicates with the GoTaq qPCR Master Mix (Promega) in 384 well plates.  
99 The PCR was run in a CFX384 Touch Real-Time PCR Detection System (BioRad) and monitored  
100 by the CFX Manager software (BioRad). Threshold values were subsequently exported to Excel and  
101 processed further. All oligos used for the PCR can be found in Supplementary Dataset 3.

### 102 Isolation of nascent RNA

103 3 grams of seedlings were flash frozen in liquid nitrogen and grinded to fine powder in a mortar. The  
104 powder was transferred to a falcon tube with 15 ml NUC1 buffer (0.4 M sucrose, 10 mM Tris-HCl pH  
105 8.0, 10 mM MgCl<sub>2</sub>, 5 mM β-mercaptoethanol, proteinase inhibitor tablet (Roche) and RNase inhibitor  
106 (Molox)) and allowed to thaw at 4°C with rotation. After centrifugation (5000 g, 20 min, 4°C), the  
107 pellet was dissolved in 1 ml NUC2 buffer (0.25 M sucrose, 10 mM Tris-HCl pH 8.0, 10 mM MgCl<sub>2</sub>, 5  
108 mM β-mercaptoethanol, proteinase inhibitor tablet, RNase inhibitor and 0.3% Tween-20) and  
109 centrifuged again (12000 g, 10 min, 4°). The resulting pellet was dissolved in 0.3 ml NUC3 buffer  
110 (1.7 M sucrose, 10 mM Tris-HCl pH 8.0, 2 mM MgCl<sub>2</sub>, 5 mM β-mercaptoethanol, proteinase inhibitor  
111 tablet, RNase inhibitor and 0.15% Tween-20), placed on top of 0.9 ml clean NUC3 buffer and  
112 centrifuged (16000 g, 60 min, 4°C). The purified nuclear fraction was dissolved and lysed in 1.5 ml

113 plaNET-seq lysis buffer (0.3 M NaCl, 20 mM Tris-HCl pH 7.5, 5 mM MgCl<sub>2</sub>, 5 mM DTT, proteinase  
114 inhibitor tablet, RNase inhibitor and 0.5% Tween-20). Lysis was performed at 4°C with rotation (2000  
115 rpm), included DNaseI treatment (Invitrogen) and was followed by centrifugation (10000 g, 10 min,  
116 4°C). The supernatant was transferred to a new tube and incubated with Dynabeads M-270  
117 (Invitrogen) bound with anti-FLAG antibody (10 µg, Sigma-Aldrich F3165) for 2 hours at 4°C with  
118 gentle rotation. Following 6 times 1 ml washes with wash buffer (0.3 M NaCl, 20 mM Tris-HCl pH  
119 7.5, 5 mM MgCl<sub>2</sub>, 5 mM DTT, proteinase inhibitor tablet and RNase inhibitor), bound proteins were  
120 eluted with 3xFLAG peptide (0.5 mg/ml, ApexBio). Elution was performed 2 times with 0.1 ml  
121 3xFLAG peptide for 20 min at 4°C. RNA attached to purified protein complexes was isolated with the  
122 miRNeasy kit (Qiagen) according to manufacturer's instructions. RNA was quantified with RNA Pico  
123 kit on Bioanalyzer 2100 (Agilent).

#### 124 **Preparation of plaNET-seq libraries and sequencing**

125 Libraries were constructed according to Bioo Scientific's NEXTflex Small RNA-seq kit v3 following a  
126 custom protocol. Unlike the original protocol provided by the manufacturer, our custom protocol  
127 incorporates RNA fragmentation step in order to avoid underrepresentation of longer molecules of  
128 nascent RNA compared to shorter ones (Supplementary fig. 1b). Approximately 100 ng RNA was  
129 used for each library. After the ligation of the 3'-linker, RNA was fragmented in alkaline solution (100  
130 mM NaCO<sub>3</sub> pH 9.2, 2 mM EDTA) to a fragment size of 20-150 bp. After fragmentation, RNA was  
131 cleaned up with AMPure RNAClean XP beads, treated with PNK (20 U, NEB) for 20 min at 37°C and  
132 then re-annealed with 8 µM RT-primer (70°C, 5 min; 37°C, 30 min; 25°C, 15 min. Oligo sequence:  
133 5'-GCCTTGGCACCCGAGAATTCCA-3'). The RNA was then re-introduced to the manufacturer's  
134 protocol at the adapter inactivation step. For detailed step-by-step library preparation protocol, refer  
135 to Supplementary fig. 1b. Depending on the library, 10-16 cycles of PCR was used and the final  
136 library was checked with Agilent's DNA High sensitivity kit on a Bioanalyzer 2100 before sequencing.  
137 Libraries were sequenced with the Illumina HiSeq-PE150 platform at Novogene (en.novogene.com).

#### 138 **Data analysis**

139 The first 4 bases of both R1 and R2 reads in plaNET-Seq are Unique Molecular Identifiers (UMIs).  
140 They were trimmed from read sequences and appended to read names using UMI-Tools v0.5.3.  
141 After UMI trimming, the 5'-terminal base of R2 corresponds to the 3'-end of original RNA molecule  
142 and thus denotes the genomic position of RNAPII active center. R2 reads were aligned to TAIR10  
143 genome assembly using STAR v2.5.2b in transcriptome-guided mode with the following settings: --  
144 outSAMmultNmax 1 --alignEndsType Extend5pOfRead1 --clip3pAdapterSeq GATCGTCGGACT.  
145 Ensembl Plants release 28 was used as the source of transcript annotation for alignment. The BAM

146 files were sorted using Samtools v1.3.1. The following categories of reads were filtered out: i) PCR  
147 duplicates (UMI-Tools); ii) Reads aligned within 100 bp from any rRNA, tRNA, snRNA or snoRNA  
148 gene from Araport11 on either strand (BEDtools v2.17.0); iii) Reads aligned with MAPQ < 10  
149 (Samtools). The filtered BAM files were imported into R environment v3.5.1 using  
150 GenomicAlignments\_1.18.1 library. The strand orientation of reads was flipped to restore strandness  
151 of the original RNA molecules. 3'-terminal bases of flipped reads were found to overlap with 5' or 3'  
152 splice sites much more frequently than could be expected by chance. Such reads most likely  
153 represent splicing intermediates due to co-immunoprecipitation of the spliceosome together with  
154 FLAG-tagged RNAPII complexes. These reads were filtered out by overlap with the union of splice  
155 sites obtained from both Ensembl Plants 28 (TxDb.Athaliana.BioMart.plantsmart28 package) and  
156 Araport11 annotations. In addition, all split reads were removed as possible mature RNA  
157 contaminations. The remaining reads are expected to represent the nascent RNA population. Their  
158 genomic coverage was exported as strand-specific BigWig and bedGraph files using  
159 rtracklayer\_1.42.2. The full pipeline is provided in the 01-Alignment\_plaNET-Seq.sh and 02-  
160 Postprocessing\_plaNET-Seq.R scripts in the code repository.

161 A few existing datasets were remapped in this study. They include pNET-Seq(14) (GSE109974),  
162 strand-specific RNA-Seq from(26) (GSE81202), as well as Direct RNA sequencing (DR-Seq) data  
163 from(27) (ERP001018) and(28) (ERP003245). The pNET-Seq libraries were processed using our  
164 plaNET-Seq pipeline (see above). Remapping of RNA-Seq and DR-Seq data is described in 03-  
165 Alignment\_GRO-Seq\_RNA-Seq\_DR-Seq.sh. We also re-used our TSS-Seq data originally  
166 published in(29) (GSE113677). Moreover, we used nucleosome occupancy tracks and nucleosome  
167 coordinates available from the PlantDHS database(30).

168 Araport11 annotation was used throughout all further steps of data analysis because it is more  
169 comprehensive in terms of non-coding transcripts than both TAIR10 and Ensembl Plants 28  
170 annotations. We adjusted gene borders from Araport11 using TSS-Seq and DR-Seq data. If multiple  
171 TSS or PAS tag clusters were connected to the same gene, the strongest of them was chosen as  
172 the new border. The relevant code is available in 04-Adjustment\_Araport11.R script.

173 To draw metagene plots of plaNET-Seq and other datasets mentioned above, we merged biological  
174 replicates and normalized the tracks to 1 million reads in nuclear protein-coding genes. The X axes  
175 of metagene plots represent the genomic intervals of choice which were scaled to the defined  
176 number of bins. Intervals overlapping multiple annotated transcription units were excluded from  
177 consideration. In particular, both introns and exons were trimmed by 5 bp each side prior to scaling  
178 to avoid possible artifacts. The Y axes show the sequencing coverage averaged between the

179 genomic intervals. The code required to reproduce metagene plots from bedGraph tracks is available  
180 in 05-Metagenes.R script.

181 Transcript borders were called *de novo* from each plaNET-Seq sample using groHMM package(31).  
182 Intervals which have less than 50% reciprocal overlap on the same strand with any known  
183 transcription unit in Araport11 were considered as novel (previously unannotated) transcripts. The  
184 novel transcripts were clustered between plaNET-Seq samples and merged to obtain a non-  
185 redundant set (n = 7228). They were further classified into divergent, convergent, PAS antisense,  
186 distal antisense or intergenic (for more details, see 06-groHMM\_pipeline.R).

187 Differentially transcribed known genes and novel transcripts were called by DESeq2(32) from  
188 unnormalized plaNET-Seq tracks with FDR < 0.05 and log2FC > 1 (see 07-DESeq2\_pipeline.R)

189 To calculate the read-through (RT) length, we considered strongly transcribed genes (plaNET-seq  
190 FPKM in WT samples above 5). Genomic intervals for RT length estimation were defined from PAS  
191 of the analyzed gene to the nearest downstream TSS. Coordinates of TSS and PAS clusters were  
192 called from TSS-seq and Direct RNA-seq datasets as described above. For each gene of interest,  
193 the empirical distribution of plaNET-seq tag counts in 100 bp sliding window was obtained (the  
194 "transcription" model). The "random" model corresponding to the untranscribed state was  
195 represented by Poisson distribution where the rate parameter was estimated from plaNET-seq tag  
196 counts in intergenic regions. Then PlaNET-seq tags were counted in every 100 bp window moving  
197 in 10 bp steps along the candidate RT genomic interval. For each window, the probability to observe  
198 at most this tag count under the gene-specific "transcription" model was divided by the probability to  
199 observe at least this tag count under the alternative "random" model. The start position of the first  
200 window where the probability ratio dropped below 1 was considered as the end of the read-through  
201 region. The code is available in 08-Readthrough\_distance.R

202 To calculate promoter-proximal RNAPII stalling index for each gene longer than 1 Kb, we first found  
203 100 bp windows with the highest plaNET-Seq coverage within the interval [TSS - 100 bp, TSS + 300  
204 bp]. Center of this window was considered as the summit of promoter-proximal RNAPII peak. The  
205 stalling index was then calculated as the ratio of plaNET-Seq coverage in this window vs the whole  
206 gene (normalized by gene width). Similarly, the intronic stalling index (ISI) was calculated for each  
207 intron longer than 50 bp: first we found the "best" 10 bp window within the intron, and then we divided  
208 its plaNET-Seq coverage by width-normalized coverage of the whole intron. Introns with FPKM-  
209 normalized plaNET-Seq coverage above 10 were further classified by their stalling index into "strong"  
210 (ISI ≥ 5.5), "medium" (3.5 < ISI < 5.5) and "weak" (ISI ≤ 3.5). For more detailed description, refer to  
211 09-Stalling\_index.R.

212 Chromatin states were downloaded from the PCSD database(33). Based on relative enrichment of  
213 different states along protein-coding genes, we combined the original 36 states into 5 groups:  
214 "Promoter" (states 13 and 15-21), "Promoter to early elongation" (states 22 and 23), "Early  
215 elongation" (states 24-26), "Late elongation" (states 3-12 and 27-28) and "Termination" (states 1 and  
216 2).  
217  
218



## 219 RESULTS

### 220 **plaNET-seq robustly detects nascent RNAPII transcription in *Arabidopsis***

221 To purify RNAPII complexes, we relied on a FLAG-immunoprecipitation of the second-largest  
222 RNAPII subunit (NRPB2-FLAG). The NRPB2-FLAG construct covers lethal null-alleles of *nrbp2*,  
223 which makes these lines suitable to capture RNAPII as all complexes carry the tagged NRPB2  
224 subunit(24). We used the nuclear fraction of flash-frozen *Arabidopsis* seedlings as starting material  
225 (Fig. 1a). RNAPII complexes were immunoprecipitated with high efficiency (Supplementary fig. 1a),  
226 and nascent RNA was purified and used for library construction (Supplementary fig. 1b). Processed  
227 reads were aligned to the *Arabidopsis* genome, identifying positions of the nascent RNA 3'-ends  
228 (Fig. 1b, upper panel). Visualized in a genome browser, plaNET-seq shows the characteristic “spiky”  
229 pattern that represents the nascent RNAPII transcription at each nucleotide. Our plaNET-seq  
230 libraries showed high reproducibility between replicates and confirmed low-velocity nascent RNAPII  
231 transcription at gene boundaries (Supplementary fig. 1c-d). We also generated a mock-IP plaNET-  
232 seq library to assess the stringency of our protocol. The signal of mock-IP plaNET-seq libraries was  
233 extremely low, supporting FLAG-IP specific signal corresponding to nascent RNAPII transcription in  
234 our samples (Fig. 1b, Supplementary fig. 1e). The libraries of nascent RNA appeared enriched for  
235 intronic reads and reads downstream of the annotated poly-(A)-site that represented RNAPII  
236 complexes undergoing termination of transcription. Steady-state methods such as RNA-seq do not  
237 provide this information on nascent RNAPII transcription, further supporting our successful  
238 enrichment for nascent RNA (Fig. 1b). We called transcripts *de novo* from plaNET-seq data using  
239 the groHMM algorithm(31) and identified thousands of transcripts not annotated in Araport11 (Fig.  
240 1c-d, Supplementary Data 1). The majority of these novel transcripts were in proximity to known  
241 genes, or overlapping them on the antisense strand (Fig. 1c-d). Overall, RNA-seq data correlated  
242 well with our plaNET-seq data for annotated transcripts but poorly for unannotated transcripts,  
243 emphasizing the power of plaNET-seq to capture transcripts undergoing rapid RNA degradation  
244 (Supplementary fig. 1f-g).

### 245 **Characterization of divergent and convergent transcription**

246 To further characterize the novel transcripts detected by plaNET-seq, we defined transcripts that  
247 start upstream (0-500 bp) from the TSS of a protein-coding gene but on the opposite strand as  
248 divergent non-coding transcripts (DNC) (Fig. 1c, Fig. 2a). DNC represents an important source of  
249 lncRNA transcription in yeast and metazoans(16,34-36), but the presence of DNC in *Arabidopsis*  
250 has been questioned(37). plaNET-seq provided evidence for DNC at 917 protein-coding genes and  
251 the DNC transcription start site (divTSS) was most often located 200-400 bp upstream from the

252 coding TSS (Fig. 2b). Thus, these data support the presence of DNC in plant genomes, although to  
253 a lower extent compared to yeast or mammals. An example of DNC was identified at the At3g28140  
254 locus (Fig. 2c). In general, genes driving DNC in plants had higher nascent RNAPII transcription on  
255 the coding strand compared to non-DNC genes (Fig. 2d), indicating that DNC was associated with  
256 NDRs of highly expressed genes. Metagene analyses of DNC using TSS-seq data in the *hua*  
257 *enhancer 2-2* mutant (*hen2-2*, a nuclear exosome mutant)(38) showed DNC degradation by the  
258 nuclear exosome in *Arabidopsis* (Fig. 2e), similar as in yeast and metazoans(35,39). DNC promoters  
259 had higher nucleosome density in the divergent non-coding direction compared to a control set of  
260 genes with similar transcription level (Supplementary fig. 2a). DNC promoters exhibited NDRs with  
261 well-defined flanking -1 and +1 nucleosomes (Supplementary fig. 2b). In conclusion, DNC  
262 transcription shares regulatory principles with budding yeast(40), an association with high definition  
263 of the -1 nucleosome, and repressed by co-transcriptional RNA degradation(41).

264 In addition to DNC, groHMM detected 5313 novel transcripts that overlap a single annotated gene  
265 transcription unit fully or partially on the antisense strand (Fig. 3a). We considered novel transcripts  
266 as antisense transcripts when they either started internally of a host gene, or no more than 20% of  
267 its length downstream (n=4922). We detected two preferential initiation sites for such antisense  
268 transcripts along the gene body (Fig. 3a). The predominant peak of initiation site frequency was  
269 found at the 3'-end of genes, defined as PAS-associated antisense transcription (n=3223). The  
270 second peak was located within the first 50% of the gene body, and we defined these transcripts as  
271 convergent antisense transcripts (CAS; n=1699). CASs have been detected in human cells(13,19)  
272 but have so far been uncharacterized in plants. The TSS of convergent transcripts (casTSS) most  
273 often initiated at a distance between 250 to 1000 bp from the sense TSSs (Supplementary fig. 3a),  
274 exemplified by the At2g46710 gene (Fig. 3b). Interestingly, casTSSs showed a strong bias towards  
275 the exon-intron boundaries with a peak very close to the 5' splice sites (5'SS, Fig. 3c). The  
276 nucleosome density upstream of the casTSS showed a sharp decrease, suggesting an intragenic  
277 NDR (Supplementary fig. 3b). Interestingly, when we assigned previously described chromatin  
278 states(33) to the bodies of *Arabidopsis* genes and explored where CAS transcription initiated, we  
279 detected an over-representation of casTSS within the chromatin states we denoted as promoter-to-  
280 early elongation (Supplementary fig. 3c-d). This indicated that the CAS initiation region coincided  
281 with a location where RNAPII complexes enter productive elongation. Genes giving rise to CAS had  
282 higher sense strand transcription compared to genes without detectable CAS (Fig. 3d). These data  
283 indicated an association of CAS with a subset of highly transcribed genes. In addition, a comparison  
284 of TSS-seq data in wild type Col-0 seedlings and *hen2-2* mutants showed that CAS transcripts are  
285 nuclear exosome targets (Fig. 3d). Thus, we characterized *Arabidopsis* CAS as nuclear exosome  
286 targets that initiate from a NDR in promoter-proximal intervals of highly expressed genes. All in all,

287 our plaNET-seq data highlights the strength of a nascent RNA detection method to identify cryptic  
288 non-coding transcripts.

### 289 **Low temperature lead to major re-programming of nascent RNAPII transcription**

290 In addition to the capture of cryptic transcripts, NET-seq interrogates the RNAPII transcription  
291 dynamics over coding and non-coding transcription units, revealing regions of low-velocity  
292 transcription. The link between temperature and transcriptional output in plants(3) lead us to  
293 hypothesize that chilling temperatures may regulate nascent RNAPII transcription over these  
294 regions. Therefore, we exposed seedlings to early stages of cold-acclimation (3 and 12 hours at 4°C,  
295 Fig. 4a). Numerous transcripts had significantly changed plaNET-seq signal over their transcription  
296 units in our conditions (Fig. 4b, Supplementary Dataset 2). The number of differentially transcribed  
297 known genes at 3h at 4°C versus 22°C greatly exceeded those detected as differentially expressed  
298 in the same conditions and identical cut off values by Transcription Start Site sequencing (TSS-  
299 seq)(2). These data suggest that the detection of steady-state levels of RNA species (i.e. by TSS-  
300 seq) does not fully capture the actual changes in nascent transcription during exposure to 4°C (Fig.  
301 4c)(2). Strikingly, 47% and 50% of known transcripts which were upregulated or downregulated after  
302 3h at 4°C, returned to baseline levels after 12h at 4°C (Fig. 4d), suggesting transient re-programming  
303 of nascent RNAPII transcription. Nascent transcription of the novel non-coding transcripts was also  
304 affected by the cold treatment, as shown on metagene plots for divergent, convergent and PAS-  
305 associated antisense transcripts (Fig. 5a-c). We detected a rapid decrease of plaNET-seq signal  
306 after 3h at 4°C that reverted back to or close to control levels after 12h at 4°C. Thus, our results  
307 support the notion that transcription of many non-coding transcripts respond rapidly to a changing  
308 environment(42). Taken together, plaNET-seq detected genome-wide transcriptional changes with  
309 increased sensitivity compared to steady-state methods and revealed a major re-programming of  
310 nascent RNAPII transcription in response to chilling temperatures.

### 311 **Exons and co-transcriptional splicing represent transient transcriptional barriers at low** 312 **temperature**

313 The re-programming of nascent RNAPII transcription in response to chilling temperatures prompted  
314 us to look closer at the effects on coding regions in the genome. Eukaryotic genes have exon-intron  
315 architecture where introns are co-transcriptionally spliced out to form a functional mRNA. The close  
316 proximity of a transcribing RNAPII complex and the spliceosome is detected with NET-seq(15,21).  
317 Splicing intermediates can readily be detected in NET-seq data, in particular the 5' splice site (5'SS)  
318 that is protected by the co-purified spliceosome (Fig. 6a), as previously reported in human NET-  
319 seq(15). We thus filtered out these read positions in our analysis since the RNAPII-associated RNA

320 3'-ends through co-purification of the spliceosome may not precisely inform on the position of  
321 nascent RNAPII transcription(15). Interestingly, when we plotted the fraction of 5'SS reads in our low  
322 temperature exposed plaNET-seq samples, we detected a strong decrease of 5'SS reads after 3h  
323 at 4°C compared to 22°C (Fig. 6b). The decrease reverted back to control levels after 12h at 4°C,  
324 suggesting that the kinetics of the splicing reaction was initially affected by low temperature (Fig.  
325 6b). Moreover, we detected a transient increase of the exon to intron ratio of nascent RNAPII  
326 transcription after 3h at 4°C compared to 22°C and 12 at 4°C (Fig. 6c). These data indicated a  
327 transiently increased nascent RNAPII transcription over exons at 4°C. Consistently, many of the  
328 transcripts upregulated after 3 hours were relatively long, multi-exonic genes compared to  
329 downregulated genes, whereas an inverse relationship was detected for expression changes from  
330 3h to 12h at 4°C (Supplementary fig. 5a-b).

331 The hypothesis that splicing kinetics may be transiently affected by low temperature prompted us to  
332 examine the connection between splicing and RNAPII transcription more closely. We applied the  
333 splicing inhibitors pladienolide B (plaB) and herboxidiene and confirmed their effect on sensitive  
334 splicing events(43) with RT-qPCR (Fig. 6d, Supplementary fig. 4a). Next, we treated seedlings with  
335 DMSO or plaB for 6 hours and generated plaNET-seq libraries. We detected a large decrease in  
336 5'SS reads in our plaB samples compared to the DMSO samples, confirming a successful inhibition  
337 of the splicing reaction (Fig. 6e-f). Our analysis identified small nuclear RNAs involved in splicing,  
338 confirming co-purification of the spliceosome with RNAPII complexes (Supplementary fig. 4b),  
339 consistent with earlier reports(15,21). Metagene profiles of internal exons revealed increased  
340 nascent RNAPII transcription upstream of the 5'SS in DMSO compared to plaB, supporting splicing-  
341 dependent RNAPII stalling before the end of exons (Fig. 6g, dashed box). This exonic RNAPII  
342 stalling was visible also in the re-analyzed pNET-Seq data(14), however only in the serine-5  
343 phosphorylation (Ser5P) track which corresponds to NRPB1 phosphorylated at Ser5 position of its  
344 C-terminal domain (Fig. 6h). In our cold-treated samples, we detected an increased peak at the end  
345 of exons after 3 hours 4°C compared to 22°C (Fig. 6i, dashed box). The increased height of the peak  
346 was transient and reverted to baseline levels after 12h at 4°C. In conclusion, our analyses support a  
347 splicing-dependent dynamic increase of nascent RNAPII transcription at the end of exons during low  
348 temperature. These data may indicate that the kinetics of the splicing reaction is transiently reduced  
349 in the chilling response.

### 350 **Identification of a novel intragenic RNAPII stalling site**

351 In introns, plaNET-Seq metagene profiles of our plaB and DMSO samples revealed a peak of  
352 nascent RNAPII transcription close to the 5'SS (Supplementary fig. 6a). Moreover, this intronic peak

353 is most clearly visible in the Ser5P track of pNET-Seq data (Supplementary fig. 6b). We called the  
354 peak coordinates in each intron using sliding window approach on Ser5p pNET-Seq data. Next, we  
355 calculated an "Intronic stalling index" (ISI) for each intron based on the plaNET-Seq data in untreated  
356 Col-0 sample. Finally, we divided the introns based on ISI into those with strong, medium or weak  
357 stalling (for more details, see Methods). The intronic peak was most frequently observed at 25 nt  
358 downstream of the 5'SS, irrespective of the ISI level (Fig. 7a). Grouping introns by ISI revealed that  
359 introns with higher ISI scores were on average longer than low ISI-score introns (Supplementary fig.  
360 6c). We therefore stratified introns according to their length to explore potential effects of the intronic  
361 peak. We detected no evidence for increased nucleosome signal in short introns (60-250 bp  
362 ( $n=97558$ ), Supplementary fig. 6d). However, we detected peaks in nucleosome density in longer  
363 introns (250-1000 bp,  $n=15991$ ), suggesting that these included one or several phased nucleosomes  
364 (Supplementary fig. 6d). We next plotted nascent RNAPII transcription over long introns compared  
365 to a control set of short introns (obtained from the same genes to avoid any effect of gene expression  
366 level). We detected a higher plaNET-Seq signal over longer introns, suggesting that long introns  
367 were transcribed more slowly compared to short introns (Supplementary fig. 6e). Thus, nucleosome  
368 barriers may contribute to a reduced transcription speed and increased plaNET-seq signal of longer  
369 introns. Interestingly, the intronic peak in short introns was largely plaB insensitive (Fig. 7b), whereas  
370 stalling in long introns was sensitive to plaB (Fig. 7c). Similarly, our cold-treated samples showed  
371 small effects of the intron peak for short introns (Fig. 7d) but a large increase of nascent RNAPII  
372 transcription after 3h at 4°C that reverted back to control levels after 12h at 4°C in long introns (Fig.  
373 7e). This observation further supported a transient decrease in kinetics of the splicing reaction after  
374 low temperature exposure. All in all, our plaB and cold-treated samples provide key information to  
375 distinguish plaNET-seq signal that is dependent on the splicing reaction from peaks of RNAPII  
376 activity independent of splicing. Our data support a RNAPII stalling site 25 nt into plant introns. The  
377 sensitivity of this peak to plaB and to low temperature correlates with intron length, perhaps indicating  
378 RNAPII-stalling associated checkpoint to improve splicing accuracy of long introns. The intronic peak  
379 of RNAPII activity represents a novel site of RNAPII stalling during gene transcription that represents  
380 the 3<sup>rd</sup> stalling site in addition to the positions at gene boundaries.

### 381 **Low temperature effects promoter-proximal RNAPII stalling**

382 To further investigate RNAPII stalling at gene boundaries, we first focused on the beginning of  
383 transcription units (i.e. promoter-proximal stalling). plaNET-seq detected a large fraction of reads at  
384 5'-ends of genes, consistent with previous studies in plants and metazoans(5,14) (Supplementary  
385 fig. 1c). We found no clear correlation between the annotated TSS position and the maximal density  
386 of nascent RNA signal on the sense strand (Supplementary fig. 6f). To test if other genomic features

387 could offer a better correlation we used nucleosome positioning data (MNase-seq). Metagene plots  
388 anchored at the center of the first nucleosome revealed a strong association with peaks of nascent  
389 RNAPII transcription (Fig. 8a), suggesting a nucleosome defined promoter proximal stalling  
390 mechanism in *Arabidopsis*. Metagene profiles for 0, 3 and 12 hours at 4°C indicated that low  
391 temperature affected RNAPII stalling at the first (i.e. +1) nucleosome (Fig. 8a). 3h at 4°C resulted in  
392 an increased peak around the center of the +1 nucleosome, indicating greater promoter-proximal  
393 stalling. In contrast, the 12h 4°C samples resulted in decreased stalling. These results prompted us  
394 to investigate if pools of RNAPII engaged in promoter-proximal stalling may facilitate temperature-  
395 dependent gene regulation. We calculated a “Promoter-proximal stalling index” from plaNET-seq  
396 data (i.e. relative nascent RNAPII transcription at the promoter proximal region versus the gene  
397 body) as previously described(14). Transcripts that were up-regulated after 3h at 4°C showed a  
398 significantly increased stalling index before low temperature treatment (22°C). In addition, transcripts  
399 that were down-regulated after 3h at 4°C exhibited significantly decreased promoter proximal stalling  
400 compared to non-regulated transcripts (Fig. 8b). These results support a role for RNAPII promoter-  
401 proximal stalling to adjust transcription to low temperature. In conclusion, plaNET-seq revealed a  
402 nucleosome defined promoter-proximal RNAPII stalling mechanism that may facilitate  
403 reprogramming of gene expression in response to temperature changes.

#### 404 **Low temperature transiently reduces 3'-end associated RNAPII stalling and read-through** 405 **transcription**

406 In addition to promoter-proximal positions, RNAPII stalls near 3'-ends of *Arabidopsis*  
407 genes(14,37,44). We detected increased nascent RNAPII transcription downstream of the poly(A)  
408 sites (PAS) (Fig. 8c). We plotted the mean plaNET-seq signal anchored on PAS sites to examine  
409 the effect of low temperature on PAS-associated RNAPII stalling. As expected, samples taken before  
410 the treatment (22°C) and after 12h at 4°C showed that RNAPII stalled downstream of the PAS (Fig.  
411 8c). Surprisingly, the peak of RNAPII stalled downstream of the PAS was abolished after 3h at 4°C,  
412 suggesting a major change in transcription dynamics associated with termination (Fig. 8c). RNAPII  
413 complexes transcribe beyond the PAS, representing the zone of transcription termination (Fig. 8d,  
414 upper panel). At control conditions (22°C), we detected a median read-through distance of 497 bp  
415 (Fig. 8d). This distance was significantly decreased at 3h 4°C (median 462 bp, Fig. 8d). However, at  
416 12h 4°C, we detected a slightly increased read-through distance (median 524 bp, Fig. 8d). Thus,  
417 genome-wide distribution of RNAPII such as PAS-associated stalling and read-through distance  
418 were transiently altered by low temperature.

419

## 420 **DISCUSSION**

### 421 **plaNET-seq reveals novel transcription units near annotated genes**

422 Here, we have used NET-seq to study how nascent RNAPII transcription adjusts to low temperature  
423 in *Arabidopsis*. Our data detected numerous novel transcripts adjacent and antisense to coding  
424 sequences. We identified divergent transcription (DNC) from promoter NDRs in *Arabidopsis*,  
425 although at a limited number of genes (Fig. 2) compared to other eukaryotes(15,35). *Arabidopsis*  
426 promoters displaying DNC have high expression in the sense direction (i.e. mRNA) and a well-  
427 defined NDR with well-positioned -1 and +1 nucleosomes (Fig. 2). However, highly expressed genes  
428 in *Arabidopsis* exist without evidence for DNC originating from their promoter NDR. We confirm the  
429 repressive effect of nuclear RNA degradation on the detection of DNC. Future studies will be required  
430 to elucidate the function of DNC, and the molecular mechanisms that direct RNAPII more strictly into  
431 the direction of mRNA transcription at shared promoter NDRs in *Arabidopsis* compared to  
432 metazoans. *Arabidopsis* also show extensive antisense initiation from promoter proximal exon-  
433 introns boundaries (i.e. CAS; Fig. 3), a common form of antisense transcription in human  
434 cells(13,19). In human and plants, promoter proximal introns regulate gene expression and include  
435 many *cis*-elements for transcription factor binding(45,46), which may explain the favored site of  
436 initiation for CAS. A focused functional dissection of CAS is currently lacking, however CAS  
437 transcription may shape the chromatin environment of the corresponding sense promoter as  
438 suggested in yeast and human(13,19,47). The casTSSs overlapped frequently with chromatin states  
439 which correspond to the transition zone for RNAPII between initiation and productive elongation (Fig.  
440 3), thus highlighting the effects of intragenic chromatin dynamics on TSS selection(29). In summary,  
441 our identification of thousands novel transcription units enabled us to detect non-coding transcription  
442 linked to gene expression at equivalent positions of transcription units across eukaryotes.

### 443 **Co-transcriptional splicing may decrease in response to low temperature**

444 Our results reveal an intragenic peak of RNAPII activity located towards the end of exons (Fig. 6g-  
445 i). Exons have well-positioned nucleosomes in human(48) and *Arabidopsis*(49) that may alter  
446 RNAPII progression to result in gradual accumulation of nascent RNAPII transcription towards the  
447 end of exons. Our data show that the exonic peak is most pronounced after 3h 4°C, perhaps  
448 reflecting challenges to transcribe through nucleosome-rich regions during initial low temperature  
449 exposure. We detected a similar position of the major stalling site within exons close to the 5'SS in  
450 DMSO-treated samples, however this exonic RNAPII stalling was abolished when splicing was  
451 chemically inhibited by plaB (Fig. 6g). These data argue that the transient peak of RNAPII at the end  
452 of exons may reflect the impact of altered splicing kinetics on nascent RNAPII transcription(50). The

453 decreased RNAPII speed nearby 5'SS may be used by the plant for regulation of alternative splicing  
454 events, a biologically essential mechanism for cold acclimation in *Arabidopsis*(23). In addition to the  
455 exonic peak, we detect a sharp peak of nascent RNAPII transcription at about 25 bp into introns.  
456 This intronic peak co-localized with RNAPII decorated by CTD-Ser5P, a post-translational RNAPII  
457 modification that has previously been linked to splicing(15). Interestingly, this peak has not been  
458 detected in yeast or human cells, arguing for diverse transcription dynamics within gene bodies  
459 between eukaryotes. We identified a reduction of nascent RNAPII transcription at the intronic peak  
460 in response to splicing inhibition by plaB treatment for long introns (i.e. 250-1000 bp). These data  
461 reveal unprecedented insight into the connections between RNAPII stalling, splicing and intron  
462 length that shape plant gene expression. We consider it plausible that this intronic RNAPII peak may  
463 represent a checkpoint for accurate splicing of long introns, where we imagine the canonical splice  
464 sites to be in a greater competition with cryptic intronic splice sites.

#### 465 **Low temperature effects RNAPII stalling at gene boundaries**

466 Our analyses of nascent RNAPII transcription highlights the relevance for mechanisms regulation  
467 “post-initiation”, in other words beyond RNAPII recruitment to gene promoters through sequence-  
468 specific transcription factors. At the 5'-end of genes, RNAPII stalls at the +1 nucleosome during  
469 *Arabidopsis* gene expression (Fig. 8a). In human, RNAPII complexes stall at a narrow window of 20-  
470 60 bp between the TSS and the +1 nucleosome boundary(15). The stalling in metazoans is  
471 influenced by the Negative Elongation Factor (NELF) complex that prevents RNAPII complexes to  
472 proceed into productive elongation(51). Interestingly, NELF is conspicuously absent in plants, which  
473 may reconcile our identification of the +1 nucleosome as the main determinant for promoter-proximal  
474 RNAPII stalling. Our data support the idea that RNAPII complexes stalled at promoter-proximal  
475 positions may be released to adjust transcription in response to decreased temperature in  
476 *Arabidopsis* (Fig. 8b). A key modulator of temperature-dependent plant gene expression is the  
477 histone variant H2A.Z incorporated into the +1 nucleosome(52). It is tempting to speculate that  
478 temperature-regulated properties of the +1 nucleosome contribute to temperature-induced  
479 expression changes of plant genes by effects on promoter-proximal RNAPII stalling.

480 At the 3'-end of genes we find a transient chilling-induced contraction of transcription units (Fig. 8c-  
481 d). We calculate the read-through distance in *Arabidopsis* to a median length of 497 bp (Fig. 8d).  
482 This can be compared to the median read-through distance in *S. cerevisiae* (200 bp)(53) and human  
483 cells (3300 bp)(20). The difference in read-through distance may be connected to the level of  
484 genome compaction; both *Arabidopsis* and *S. cerevisiae* have gene-denser genomes compared to  
485 humans. Gene-dense genomes increase the probability of RNAPII collisions by read-through  
486 transcription with harmful consequences for genome stability(54,55). We have not failed to notice



487 that the transient effects on RNAPII read-through distance during low temperature exposure could  
488 be consistent with changes in liquid phase viscosity implicated in *Arabidopsis* 3'-end formation(56).  
489 Perhaps, our 3h 4°C time-point captures cells during a metabolic adjustment of nuclear liquid  
490 environments including those promoting 3'-end formation.

491 In conclusion, the temperature-induced genome-wide adaptations required to maintain cellular  
492 functions provide insight into molecular alterations that promote organismal fitness during  
493 environmental change. Our work identifies key parameters of nascent RNAPII transcription that  
494 control the transcriptional cold-response in *Arabidopsis* and possibly other eukaryotes.

495

#### 496 **AVAILABILITY**

497 The scripts required to reproduce all results and figures are available at GitHub:  
498 [[https://github.com/Maxim-Ivanov/Kindgren\\_et\\_al\\_2019](https://github.com/Maxim-Ivanov/Kindgren_et_al_2019)].

499

#### 500 **ACCESSION NUMBERS**

501 plaNET-Seq data is available at NCBI GEO database with accession code GSE131733 (reviewer  
502 token: mneleckgrzynjsz).

503

#### 504 **SUPPLEMENTARY DATA**

505 Supplementary data consisting of six figures and three data files are available as a separate  
506 document.

507

#### 508 **FUNDING**

509 This research was supported the Novo Nordisk Foundation [Hallas-Møller Investigator award  
510 NNF15OC0014202 to S.M.] and a Copenhagen Plant Science Centre Young Investigator Starting  
511 grant to S.M.. This project has received funding from the European Research Council (ERC) and  
512 the Marie Curie Actions under the European Union's Horizon 2020 research and innovation  
513 programme [StG2017-757411 to S.M.,MSCA-IF 703085 to P.K.]. Funding for open access charge:  
514 European Union's Horizon 2020 research and innovation programme [StG2017-757411].

515

#### 516 **CONFLICT OF INTEREST**

517 The authors declare no conflict of interest.

518

#### 519 **ACKNOWLEDGEMENTS**

520 We would like to thank Albin Sandelin and members of the Marquardt lab for critical reading of the  
521 manuscript. Adam R. Morris from Bioo Scientific is acknowledged for assistance with modifications  
522 to the library construction protocol.

523

524

525 **REFERENCES**

- 526 1. Markovskaya, E.F. and Shibaeva, T.G. (2017) Low temperature sensors in plants: Hypotheses and  
527 assumptions. *Biology Bulletin*, **44**, 150-158.
- 528 2. Kindgren, P., Ard, R., Ivanov, M. and Marquardt, S. (2018) Transcriptional read-through of the long  
529 non-coding RNA SVALKKA governs plant cold acclimation. *Nature Communications*, **9**, 4561.
- 530 3. Thomashow, M.F. (1999) PLANT COLD ACCLIMATION: Freezing Tolerance Genes and Regulatory  
531 Mechanisms. *Annual Review of Plant Physiology and Plant Molecular Biology*, **50**, 571-599.
- 532 4. Mayer, A., Landry, H.M. and Churchman, L.S. (2017) Pause & go: from the discovery of RNA  
533 polymerase pausing to its functional implications. *Current opinion in cell biology*, **46**, 72-80.
- 534 5. Adelman, K. and Lis, J.T. (2012) Promoter-proximal pausing of RNA polymerase II: emerging roles in  
535 metazoans. *Nature reviews. Genetics*, **13**, 720-731.
- 536 6. Rougvie, A.E. and Lis, J.T. (1988) The RNA polymerase II molecule at the 5' end of the uninduced  
537 hsp70 gene of *D. melanogaster* is transcriptionally engaged. *Cell*, **54**, 795-804.
- 538 7. Bunch, H., Zheng, X., Burkholder, A., Dillon, S.T., Motola, S., Birrane, G., Ebmeier, C.C., Levine, S.,  
539 Fargo, D., Hu, G. *et al.* (2014) TRIM28 regulates RNA polymerase II promoter-proximal pausing and  
540 pause release. *Nature structural & molecular biology*, **21**, 876-883.
- 541 8. Proudfoot, N.J. (2016) Transcriptional termination in mammals: Stopping the RNA polymerase II  
542 juggernaut. *Science*, **352**, aad9926.
- 543 9. Connelly, S. and Manley, J.L. (1988) A functional mRNA polyadenylation signal is required for  
544 transcription termination by RNA polymerase II. *Genes & Development*, **2**, 440-452.
- 545 10. Buratowski, S. (2005) Connections between mRNA 3' end processing and transcription termination.  
546 *Current Opinion in Cell Biology*, **17**, 257-261.
- 547 11. Hazelbaker, Dane Z., Marquardt, S., Wlotzka, W. and Buratowski, S. (2013) Kinetic Competition  
548 between RNA Polymerase II and Sen1-Dependent Transcription Termination. *Molecular Cell*, **49**, 55-  
549 66.
- 550 12. Vilborg, A., Sabath, N., Wiesel, Y., Nathans, J., Levy-Adam, F., Yario, T.A., Steitz, J.A. and Shalgi, R.  
551 (2017) Comparative analysis reveals genomic features of stress-induced transcriptional readthrough.  
552 *Proceedings of the National Academy of Sciences*, **114**, E8362-E8371.
- 553 13. Mayer, A., di Iulio, J., Maleri, S., Eser, U., Vierstra, J., Reynolds, A., Sandstrom, R.,  
554 Stamatoyannopoulos, John A. and Churchman, L.S. (2015) Native Elongating Transcript Sequencing  
555 Reveals Human Transcriptional Activity at Nucleotide Resolution. *Cell*, **161**, 541-554.
- 556 14. Zhu, J., Liu, M., Liu, X. and Dong, Z. (2018) RNA polymerase II activity revealed by GRO-seq and pNET-  
557 seq in Arabidopsis. *Nature Plants*, **4**, 1112-1123.
- 558 15. Nojima, T., Gomes, T., Grosso, Ana Rita F., Kimura, H., Dye, Michael J., Dhir, S., Carmo-Fonseca, M.  
559 and Proudfoot, Nicholas J. (2015) Mammalian NET-Seq Reveals Genome-wide Nascent Transcription  
560 Coupled to RNA Processing. *Cell*, **161**, 526-540.
- 561 16. Churchman, L.S. and Weissman, J.S. (2011) Nascent transcript sequencing visualizes transcription at  
562 nucleotide resolution. *Nature*, **469**, 368.
- 563 17. Schlackow, M., Nojima, T., Gomes, T., Dhir, A., Carmo-Fonseca, M. and Proudfoot, N.J. (2017)  
564 Distinctive Patterns of Transcription and RNA Processing for Human lincRNAs. *Molecular Cell*, **65**, 25-  
565 38.
- 566 18. Andersson, R., Refsing Andersen, P., Valen, E., Core, L.J., Bornholdt, J., Boyd, M., Heick Jensen, T. and  
567 Sandelin, A. (2014) Nuclear stability and transcriptional directionality separate functionally distinct  
568 RNA species. *Nature Communications*, **5**, 5336.
- 569 19. Brown, T., Howe, F.S., Murray, S.C., Wouters, M., Lorenz, P., Seward, E., Rata, S., Angel, A. and Mellor,  
570 J. (2018) Antisense transcription-dependent chromatin signature modulates sense transcript  
571 dynamics. *Molecular Systems Biology*, **14**, e8007.

- 572 20. Schwalb, B., Michel, M., Zacher, B., Frühauf, K., Demel, C., Tresch, A., Gagneur, J. and Cramer, P.  
573 (2016) TT-seq maps the human transient transcriptome. *Science*, **352**, 1225-1228.
- 574 21. Nojima, T., Rebelo, K., Gomes, T., Grosso, A.R., Proudfoot, N.J. and Carmo-Fonseca, M. (2018) RNA  
575 Polymerase II Phosphorylated on CTD Serine 5 Interacts with the Spliceosome during Co-  
576 transcriptional Splicing. *Molecular Cell*, **72**, 369-379.e364.
- 577 22. Capovilla, G., Delhomme, N., Collani, S., Shutava, I., Bezrukov, I., Symeonidi, E., de Francisco Amorim,  
578 M., Laubinger, S. and Schmid, M. (2018) PORCUPINE regulates development in response to  
579 temperature through alternative splicing. *Nature Plants*, **4**, 534-539.
- 580 23. Calixto, C.P.G., Guo, W., James, A.B., Tzioutziou, N.A., Entizne, J.C., Panter, P.E., Knight, H., Nimmo,  
581 H.G., Zhang, R. and Brown, J.W.S. (2018) Rapid and Dynamic Alternative Splicing Impacts the  
582 Arabidopsis Cold Response Transcriptome. *The Plant Cell*, **30**, 1424-1444.
- 583 24. Onodera, Y., Nakagawa, K., Haag, J.R., Pikaard, D., Mikami, T., Ream, T., Ito, Y. and Pikaard, C.S. (2008)  
584 Sex-biased lethality or transmission of defective transcription machinery in Arabidopsis. *Genetics*,  
585 **180**, 207-218.
- 586 25. Exner, V., Taranto, P., Schönrock, N., Gruissem, W. and Hennig, L. (2006) Chromatin assembly factor  
587 CAF-1 is required for cellular differentiation during plant development. *Development*, **133**, 4163-  
588 4172.
- 589 26. Kohnen, M.V., Schmid-Siegert, E., Trevisan, M., Petrolati, L.A., Sénéchal, F., Müller-Moulé, P., Maloof,  
590 J., Xenarios, I. and Fankhauser, C. (2016) Neighbor Detection Induces Organ-Specific Transcriptomes,  
591 Revealing Patterns Underlying Hypocotyl-Specific Growth. *The Plant Cell*, **28**, 2889-2904.
- 592 27. Sherstnev, A., Duc, C., Cole, C., Zacharaki, V., Hornyik, C., Oszolak, F., Milos, P.M., Barton, G.J. and  
593 Simpson, G.G. (2012) Direct sequencing of Arabidopsis thaliana RNA reveals patterns of cleavage and  
594 polyadenylation. *Nature Structural & Molecular Biology*, **19**, 845.
- 595 28. Schurch, N.J., Cole, C., Sherstnev, A., Song, J., Duc, C., Storey, K.G., McLean, W.H.I., Brown, S.J.,  
596 Simpson, G.G. and Barton, G.J. (2014) Improved annotation of 3' untranslated regions and complex  
597 loci by combination of strand-specific direct RNA sequencing, RNA-Seq and ESTs. *PLoS One*,  
598 10.1371/journal.pone.0094270.
- 599 29. Nielsen, M., Ard, R., Leng, X., Ivanov, M., Kindgren, P., Pelechano, V. and Marquardt, S. (2019)  
600 Transcription-driven chromatin repression of Intragenic transcription start sites. *PLOS Genetics*, **15**,  
601 e1007969.
- 602 30. Zhang, T., Zhang, W. and Jiang, J. (2015) Genome-Wide Nucleosome Occupancy and Positioning and  
603 Their Impact on Gene Expression and Evolution in Plants. *Plant Physiology*, **168**, 1406-1416.
- 604 31. Chae, M., Danko, C.G. and Kraus, W.L. (2015) groHMM: a computational tool for identifying  
605 unannotated and cell type-specific transcription units from global run-on sequencing data. *BMC*  
606 *Bioinformatics*, **16**, 222.
- 607 32. Love, M.I., Huber, W. and Anders, S. (2014) Moderated estimation of fold change and dispersion for  
608 RNA-seq data with DESeq2. *Genome Biology*, **15**, 550.
- 609 33. Liu, Y., Tian, T., Zhang, K., You, Q., Yan, H., Zhao, N., Yi, X., Xu, W. and Su, Z. (2017) PCSD: a plant  
610 chromatin state database. *Nucleic Acids Research*, **46**, D1157-D1167.
- 611 34. Core, L.J., Waterfall, J.J. and Lis, J.T. (2008) Nascent RNA Sequencing Reveals Widespread Pausing  
612 and Divergent Initiation at Human Promoters. *Science*, **322**, 1845-1848.
- 613 35. Neil, H., Malabat, C., d'Aubenton-Carafa, Y., Xu, Z., Steinmetz, L.M. and Jacquier, A. (2009)  
614 Widespread bidirectional promoters are the major source of cryptic transcripts in yeast. *Nature*, **457**,  
615 1038.
- 616 36. Seila, A.C., Calabrese, J.M., Levine, S.S., Yeo, G.W., Rahl, P.B., Flynn, R.A., Young, R.A. and Sharp, P.A.  
617 (2008) Divergent Transcription from Active Promoters. *Science*, **322**, 1849-1851.
- 618 37. Hetzel, J., Duttke, S.H., Benner, C. and Chory, J. (2016) Nascent RNA sequencing reveals distinct  
619 features in plant transcription. *Proceedings of the National Academy of Sciences*, **113**, 12316-12321.
- 620 38. Lange, H., Zuber, H., Sement, F.M., Chicher, J., Kuhn, L., Hammann, P., Brunaud, V., Bérard, C.,  
621 Bouteiller, N., Balzergue, S. et al. (2014) The RNA Helicases AtMTR4 and HEN2 Target Specific Subsets

- 622 of Nuclear Transcripts for Degradation by the Nuclear Exosome in *Arabidopsis thaliana*. *PLOS*  
623 *Genetics*, **10**, e1004564.
- 624 39. Jensen, Torben H., Jacquier, A. and Libri, D. (2013) Dealing with Pervasive Transcription. *Molecular*  
625 *Cell*, **52**, 473-484.
- 626 40. Marquardt, S., Escalante-Chong, R., Pho, N., Wang, J., Churchman, L.S., Springer, M. and Buratowski,  
627 S. (2014) A Chromatin-Based Mechanism for Limiting Divergent Noncoding Transcription. *Cell*, **157**,  
628 1712-1723.
- 629 41. Xu, Z., Wei, W., Gagneur, J., Perocchi, F., Clauder-Münster, S., Camblong, J., Guffanti, E., Stutz, F.,  
630 Huber, W. and Steinmetz, L.M. (2009) Bidirectional promoters generate pervasive transcription in  
631 yeast. *Nature*, **457**, 1033-1037.
- 632 42. Matsui, A., Ishida, J., Morosawa, T., Mochizuki, Y., Kaminuma, E., Endo, T.A., Okamoto, M., Nambara,  
633 E., Nakajima, M., Kawashima, M. *et al.* (2008) Arabidopsis Transcriptome Analysis under Drought,  
634 Cold, High-Salinity and ABA Treatment Conditions using a Tiling Array. *Plant and Cell Physiology*, **49**,  
635 1135-1149.
- 636 43. AlShareef, S., Ling, Y., Butt, H., Mariappan, K.G., Benhamed, M. and Mahfouz, M.M. (2017)  
637 Herboxidiene triggers splicing repression and abiotic stress responses in plants. *BMC Genomics*, **18**,  
638 260.
- 639 44. Liu, W., Duttke, S.H., Hetzel, J., Groth, M., Feng, S., Gallego-Bartolome, J., Zhong, Z., Kuo, H.Y., Wang,  
640 Z., Zhai, J. *et al.* (2018) RNA-directed DNA methylation involves co-transcriptional small-RNA-guided  
641 slicing of polymerase V transcripts in *Arabidopsis*. *Nature plants*, **4**, 181-188.
- 642 45. Majewski, J. and Ott, J. (2002) Distribution and characterization of regulatory elements in the human  
643 genome. *Genome research*, **12**, 1827-1836.
- 644 46. Rose, A.B., Elfersi, T., Parra, G. and Korf, I. (2008) Promoter-Proximal Introns in *Arabidopsis thaliana*  
645 Are Enriched in Dispersed Signals that Elevate Gene Expression. *The Plant Cell*, **20**, 543-551.
- 646 47. Xu, Z., Wei, W., Gagneur, J., Clauder-Münster, S., Smolik, M., Huber, W. and Steinmetz, L.M. (2011)  
647 Antisense expression increases gene expression variability and locus interdependency. *Molecular*  
648 *Systems Biology*, **7**, 468.
- 649 48. Andersson, R., Enroth, S., Rada-Iglesias, A., Wadelius, C. and Komorowski, J. (2009) Nucleosomes are  
650 well positioned in exons and carry characteristic histone modifications. *Genome Research*, **19**, 1732-  
651 1741.
- 652 49. Chodavarapu, R.K., Feng, S., Bernatavichute, Y.V., Chen, P.-Y., Stroud, H., Yu, Y., Hetzel, J.A., Kuo, F.,  
653 Kim, J., Cokus, S.J. *et al.* (2010) Relationship between nucleosome positioning and DNA methylation.  
654 *Nature*, **466**, 388.
- 655 50. Nogués, G., Muñoz, M.J. and Kornblihtt, A.R. (2003) Influence of Polymerase II Processivity on  
656 Alternative Splicing Depends on Splice Site Strength. *Journal of Biological Chemistry*, **278**, 52166-  
657 52171.
- 658 51. Vos, S.M., Farnung, L., Urlaub, H. and Cramer, P. (2018) Structure of paused transcription complex  
659 Pol II–DSIF–NELF. *Nature*, **560**, 601-606.
- 660 52. Kumar, S.V. and Wigge, P.A. (2010) H2A.Z-Containing Nucleosomes Mediate the Thermosensory  
661 Response in *Arabidopsis*. *Cell*, **140**, 136-147.
- 662 53. Birse, C.E., Minvielle-Sebastia, L., Lee, B.A., Keller, W. and Proudfoot, N.J. (1998) Coupling  
663 Termination of Transcription to Messenger RNA Maturation in Yeast. *Science*, **280**, 298-301.
- 664 54. Prescott, E.M. and Proudfoot, N.J. (2002) Transcriptional collision between convergent genes in  
665 budding yeast. *Proceedings of the National Academy of Sciences*, **99**, 8796-8801.
- 666 55. Hobson, D.J., Wei, W., Steinmetz, L.M. and Svejstrup, J.Q. (2012) RNA polymerase II collision  
667 interrupts convergent transcription. *Molecular cell*, **48**, 365-374.
- 668 56. Fang, X., Wang, L., Ishikawa, R., Li, Y., Fiedler, M., Liu, F., Calder, G., Rowan, B., Weigel, D., Li, P. *et al.*  
669 (2019) Arabidopsis FLL2 promotes liquid–liquid phase separation of polyadenylation complexes.  
670 *Nature*.

671

672

673 **Figures and Tables captions**

674 **Figure 1: Genome-wide detection of nascent transcription in response to low temperature**  
675 **with plaNET-seq**

676 **a**, Workflow of plaNET-seq. Chromatin from a stable NRPB2-FLAG line is isolated and DNase  
677 treated. After immunoprecipitation and disruption of protein complexes, RNAPII-attached RNA is  
678 purified and used for library construction. The base at the 3'-end of the sequenced RNA is the last  
679 base added by the RNAPII complex and therefore aligns to the genomic position of transcriptionally  
680 engaged RNAPII.

681 **b**, An example of plaNET-seq coverage profile for the gene At1g25550. Positions of RNAPII are  
682 shown for sense (blue) and antisense (red) strands. For comparison, mock-IP (negative control)  
683 plaNET-Seq sample, as well as stranded RNA-seq, TSS-seq (Transcription start site sequencing)  
684 and DR-seq (Direct RNA sequencing) tracks are also shown. The DR-Seq track reveals sites of  
685 mRNA cleavage and polyadenylation (PAS).

686 **c**, Definition of novel transcripts detected by plaNET-seq. Divergent transcripts initiate no more than  
687 500 bp upstream of a coding transcript TSS. Upstream transcripts initiate on the sense strand and  
688 partly overlap with an annotated transcript. Convergent transcripts initiate from the 5'-half of a coding  
689 gene body on the antisense strand. PAS-associated transcripts initiate from the 3'-half or no more  
690 than 20% downstream of its length on the antisense strand. Downstream transcripts initiate within a  
691 gene on the sense strand and continue beyond the annotated PAS. Distal antisense transcripts  
692 overlap with annotated gene on the antisense strand but initiate further downstream than 20% of the  
693 gene's length. Finally, if a transcript was not described by any of the above mentioned classes, it  
694 was defined as an intergenic transcript.

695 **d**, Bar chart of the number of transcripts that fall into the classes described in **(a)**. Known non-coding  
696 transcripts in Araport11 are shown in checkered fill and novel transcript identified by plaNET-seq  
697 without fill.

698 **Figure 2: Divergent transcription occurs at highly active NDRs**

699 **a**, Schematic illustration of a divergent promoter. The nucleosomes surrounding the shared NDR are  
700 defined as -1 (DNC direction) and +1 (coding direction).

701 **b**, Histogram of the absolute distance between start site for the divergent transcript (divTSS) and the  
702 coding TSS (bp).

703 **c**, An example of a divergent promoter (At3g28140). Nascent RNAPII transcription is shown for  
704 sense and divergent transcripts in blue and purple, respectively.

705 **d**, Box plot of transcription level of protein-coding genes with a DNC (purple) and without a DNC  
706 (grey) as measured by plaNET-seq. Statistical significance of differences was assessed by two-  
707 sided Mann-Whitney U test.

708 **e**, Metagene analysis of TSS-Seq signal on the antisense strand of DNC promoters. Wild type signal  
709 is shown in black and the nuclear exosome mutant *hen2-2* in red. DNC could be detected with TSS-  
710 seq data and DNC were targeted by the nuclear exosome. The shaded area shows 95% confidence  
711 interval for the mean.

712 **Figure 3: Convergent antisense transcription is a common feature in *Arabidopsis***

713 **a**, Histogram of the relative distance between initiation sites of antisense transcripts and the sense  
714 TSS (expressed as fraction of the sense gene length). Antisense transcription was defined either as  
715 convergent (if initiated within the first 50% of the sense gene length: red bars), or as PAS-associated  
716 (if initiated within the second 50% of the sense gene length or after the PAS up to a distance of 20%  
717 of the gene length after the gene end).

718 **b**, An example of a convergent transcript (At2g46710). Nascent RNAPII transcription is shown for  
719 sense and convergent transcripts in blue and red, respectively.

720 **c**, Histogram of distances between the start sites of convergent transcripts and the first 5' splice site  
721 (5'SS) (left panel) or the second 5'SS (right panel).

722 **d**, Box plot of transcription level of coding transcripts with a CAS and without a CAS. Statistical  
723 significance of the difference was measured by two-sided Mann-Whitney U test. Genes with a CAS  
724 showed higher transcription in the sense direction compared to those without a CAS.

725 **e**, Metagene analysis of TSS-seq signal on the antisense strand in 1 kb windows anchored at the  
726 casTSS. Wild type signal is shown in black and the nuclear exosome mutant *hen2-2* in red. CAS  
727 could be detected with TSS-seq data, and CAS are targeted by the nuclear exosome. The shaded  
728 area shows 95% confidence interval for the mean.

729

730 **d**, Metagene analysis of nucleosome density in 1 kb windows centered at the convergent transcript  
731 start site (casTSS). The shaded area shows 95% confidence interval for the mean.



732 **d**, Metagene analysis of chromatin states determined by ChromHMM along the gene bodies of  
733 Arabidopsis genes. Based on the PCSD database, the following states were assigned to respective  
734 group: promoter (Prom; states 13, 15-21), promoter-to-early elongation (PromToEarly; states 22-  
735 23), early elongation (Early; states 24-26), late elongation (Late; states 3-12, 27-28) and polyA (pA;  
736 states 1-2). Each CAS was assigned a chromatin state group based on overlap with casTSS.  
737 Observed frequencies of casTSS were plotted together with the expected frequencies of overlap  
738 based on the random model.

739 **e**, Metagene analysis of plaNET-Seq signal on the sense and the antisense strand in windows  
740 anchored at the casTSS. 22°C (control sample) is shown in black, 3h 4°C in blue, 12h 4°C in light  
741 blue. The shaded area shows 95% confidence interval for the mean.

#### 742 **Figure 4: Low temperature leads to re-programming of nascent RNAPII transcription**

743 **a**, Illustration of the experimental design of low temperature exposure. Seedlings were grown for 12  
744 days under a long day light regime on agar plates. Exposure to low temperature was performed for  
745 3 or 12 hours during the light hours and samples collected and flash frozen in liquid nitrogen.

746 **b**, The number of differently transcribed genes determined by plaNET-seq in response to low  
747 temperature treatment.

748 **c**, Numbers of up- and down-regulated transcripts after 3 h at 4°C (compared to the control grown  
749 at 22°C) as determined by DESeq2 using plaNET-seq and TSS-seq data. The transcriptional  
750 changes detected by plaNET-seq exceeded those detected with the same cutoff values by TSS-seq.

751 **d**, Schematic time course of how differently transcribed genes after 3h at 4°C are regulated at 12h  
752 at 4°C compared to control.

#### 753 **Figure 5: Nascent RNAPII transcription of non-coding transcripts is affected by cold**

754 Metagene analysis of the plaNET-Seq signal in a 1 kb window for **(a)** DNC, anchored at the divTSS,  
755 **(b)** CAS, anchored at the casTSS and **(c)** PAS-AS, anchored at the PAS-AS TSS. 22°C (control  
756 sample) is shown in black, 3h 4°C in blue, 12h 4°C in light blue. The shaded area shows 95%  
757 confidence interval for the mean.

#### 758 **Figure 6: The effect of splicing and intragenic RNAPII stalling**

759 **a**, Illustration of the RNAPII-spliceosome complex during active transcription. The spliceosome  
760 protects the 5'SS and the splicing intermediates are co-purified with transcriptionally engaged  
761 RNAPII complex in NET-seq.

762 **b**, Bar chart of the percentage of 5'SS intermediates found in the control and low temperature  
763 exposed replicates of plaNET-seq.

764 **c**, Histogram showing the ratio between plaNET-seq reads mapping to all exons and all introns in  
765 the replicates of low temperature treatment.

766 **d**, RT-qPCR validation of the plaB treatment efficiency (shown for a splicing event of the At2g39550  
767 mRNA). Bars represent mean  $\pm$  SEM of three biological replicates (circles). The statistical  
768 significance of differences was calculated by two-sided t-test. \* $p < 0.05$ , \*\* $p < 0.01$ .

769 **e**, PlaNET-seq co-purifies splicing intermediates, predominantly 5'SS species. The effect of the  
770 splicing inhibitor plaB is shown for the gene At2g39550.

771 **f**, Bar chart of the percentage of 5'SS intermediates found in the plaNET-seq DMSO and plaB  
772 replicates.

773 **g**, Metagene analysis of nascent RNAPII transcription over the 3'-half of internal exons as  
774 determined by plaNET-seq. DMSO is shown in blue and plaB in red. Dashed box indicates stalling  
775 site at the 3'-end of exons. The shaded area shows 95% confidence interval for the mean.

776 **h**, Metagene analysis of nascent RNAPII transcription over the 3'-half of internal exons as  
777 determined by pNET-seq. Data from the Ser5P antibody is shown in black, Ser2P in red,  
778 Unphosphorylated in purple and total RNAPII in blue. Dashed box indicates stalling site at the 3'-end  
779 of exons. The shaded area shows 95% confidence interval for the mean.

780 **i**, Metagene analysis of nascent RNAPII transcription over the 3'-half of internal exons as determined  
781 by plaNET-seq. 22°C (control sample) is shown in black, 3h 4°C in blue, 12h 4°C in light blue. Dashed  
782 box indicates stalling site at the 3'-end of exons. The shaded area shows 95% confidence interval  
783 for the mean.

#### 784 **Figure 7: Identification of a novel RNAPII stalling site in introns**

785 **a**, Absolute distance of the intronic peak from the 5'SS. Only introns with FPKM-normalized plaNET-  
786 Seq coverage above 10 are shown. Introns with strong intronic stalling index ( $ISI \geq 5.5$ ) are shown  
787 in red, medium ( $3.5 < ISI < 5.5$ ) in black and weak ( $ISI \leq 3.5$ ) in blue.

788 **b**, Metagene analysis of nascent RNAPII transcription in short introns as determined by plaNET-  
789 Seq. DMSO is shown in blue and plaB in red. Dashed box indicates stalling site at the 3'-end of  
790 exons. The shaded area shows 95% confidence interval for the mean.

791 **c**, Metagene analysis of nascent RNAPII transcription in long introns as determined by plaNET-Seq.  
792 DMSO is shown in blue and plaB in red. Dashed box indicates stalling site at the 3'-end of exons.  
793 The shaded area shows 95% confidence interval for the mean.

794 **d**, Metagene analysis of nascent RNAPII transcription in short introns as determined by plaNET-  
795 Seq. 22°C (control sample) is shown in black, 3h 4°C in blue, 12h 4°C in light blue. Dashed box  
796 indicates stalling site at the 3'-end of exons. The shaded area shows 95% confidence interval for the  
797 mean.

798 **e**, Metagene analysis of nascent RNAPII transcription in long introns as determined by plaNET-Seq.  
799 22°C (control sample) is shown in black, 3h 4°C in blue, 12h 4°C in light blue. Dashed box indicates  
800 stalling site at the 3'-end of exons. The shaded area shows 95% confidence interval for the mean.

801 **Figure 8: Low temperature affects RNAPII stalling at gene boundaries**

802 **a**, Metagene analysis of the plaNET-Seq signal in a 1 kb window anchored at the center of +1  
803 nucleosome. 22°C (control sample) is shown in black, 3h 4°C in blue, 12h 4°C in light blue. The  
804 shaded area shows 95% confidence interval for the mean.

805 **b**, Box plot of promoter-proximal stalling index in control conditions (22<sup>0</sup>C) of genes which are  
806 differently transcribed at 3h 4°C. Black denotes transcripts with unchanged expression, red denotes  
807 upregulated transcripts and blue denotes downregulated transcripts. Statistical differences were  
808 assessed by two-sided Mann-Whitney U test.

809 **c**, Metagene analysis of the plaNET-Seq signal in a 1 kb window anchored at the PAS. 22°C is  
810 shown in black, 3h 4°C is shown in blue, 12h 4°C is shown in light blue. The shaded area shows  
811 95% confidence interval for the mean.

812 **d**, Upper panel illustrates the definition of read-through distance while lower panel shows a box plot  
813 of the read-through distance (bp) in 22°C (black), 3h 4°C (blue) and 12h 4°C (light blue) samples.  
814 Statistical differences were assessed by two-sided Mann-Whitney U test.

815

## Figure 1

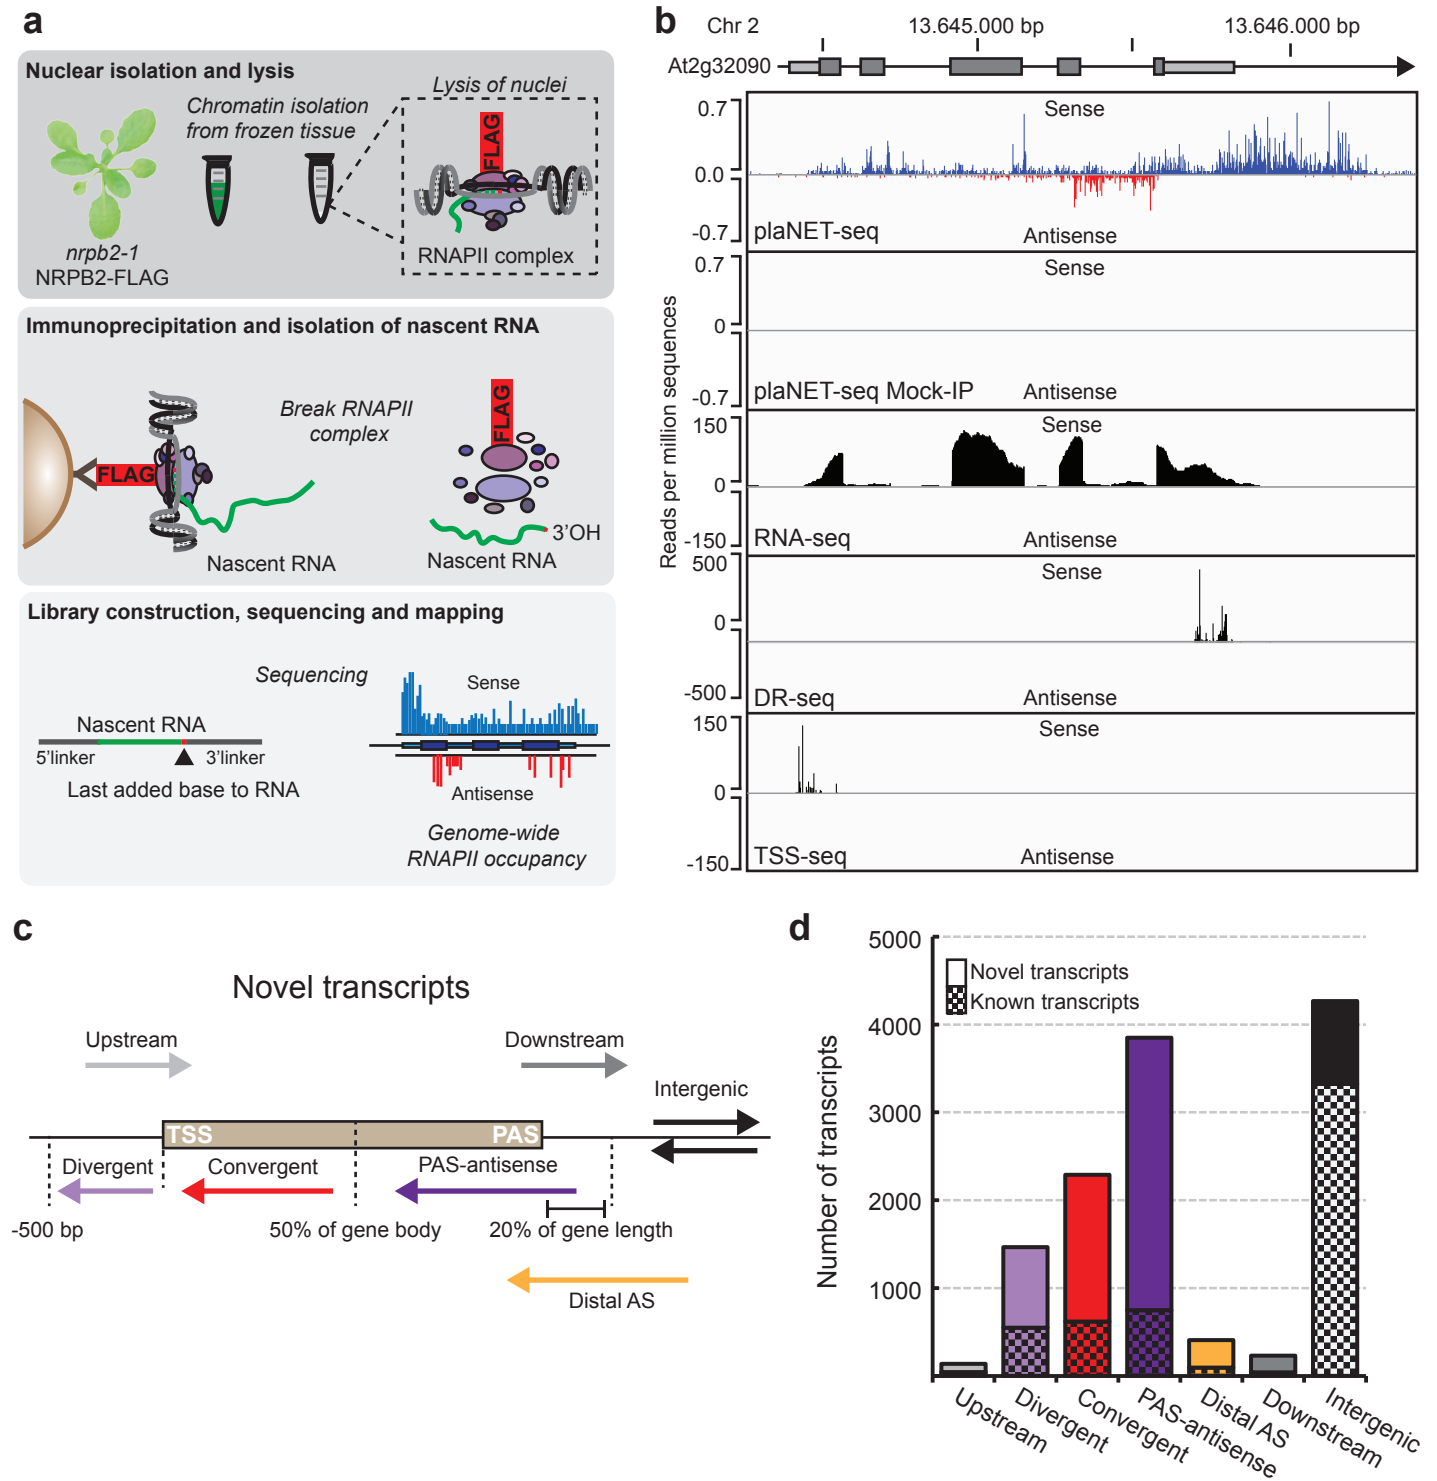

## Figure 2

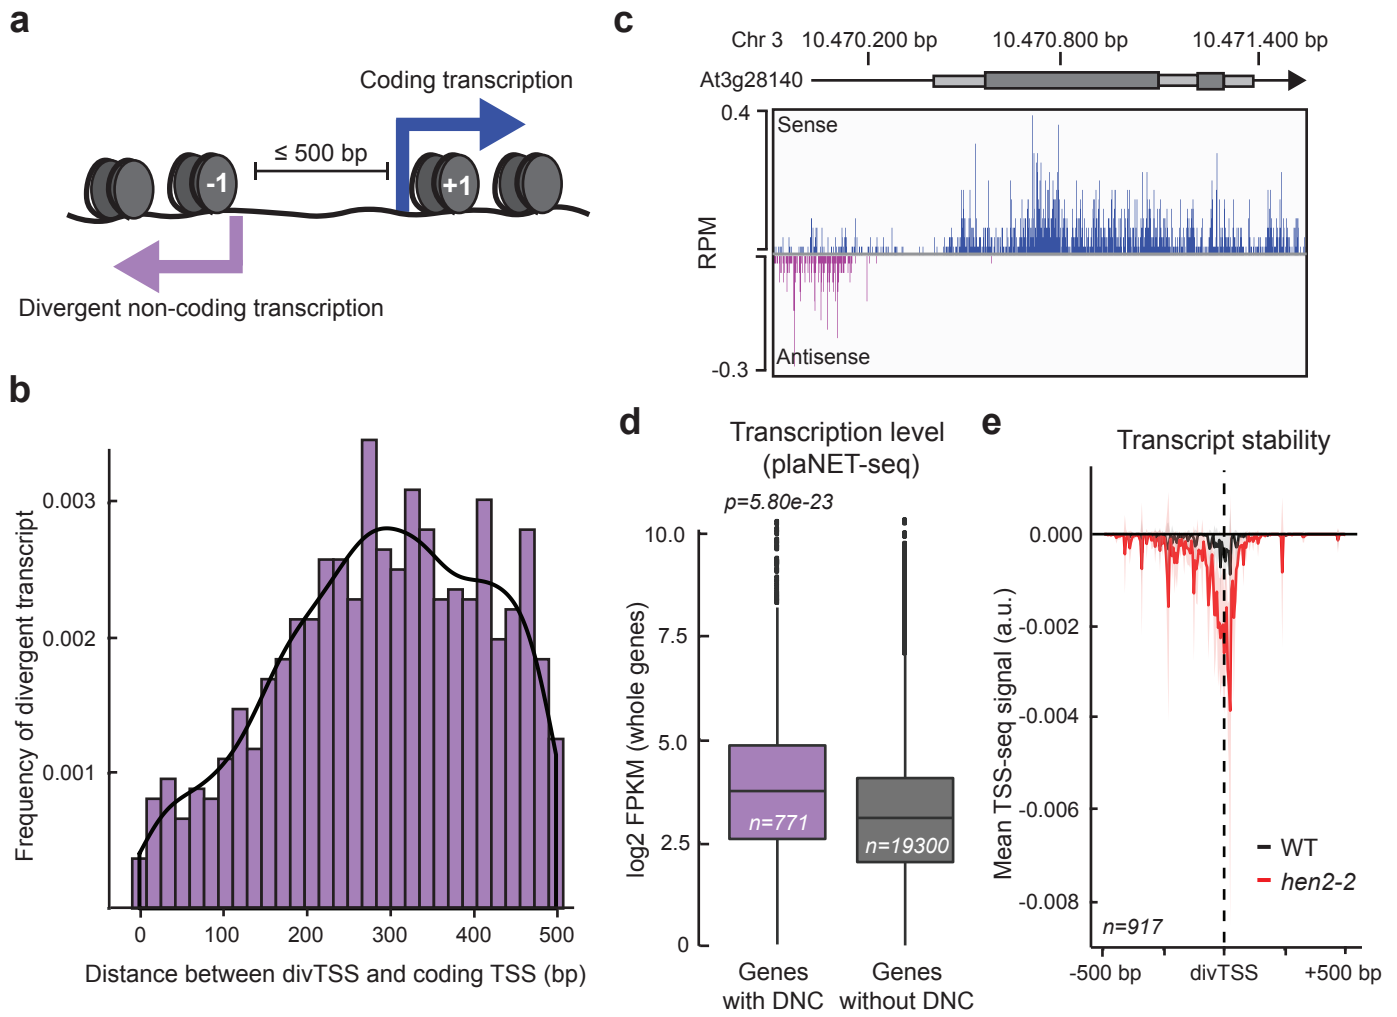

## Figure 3

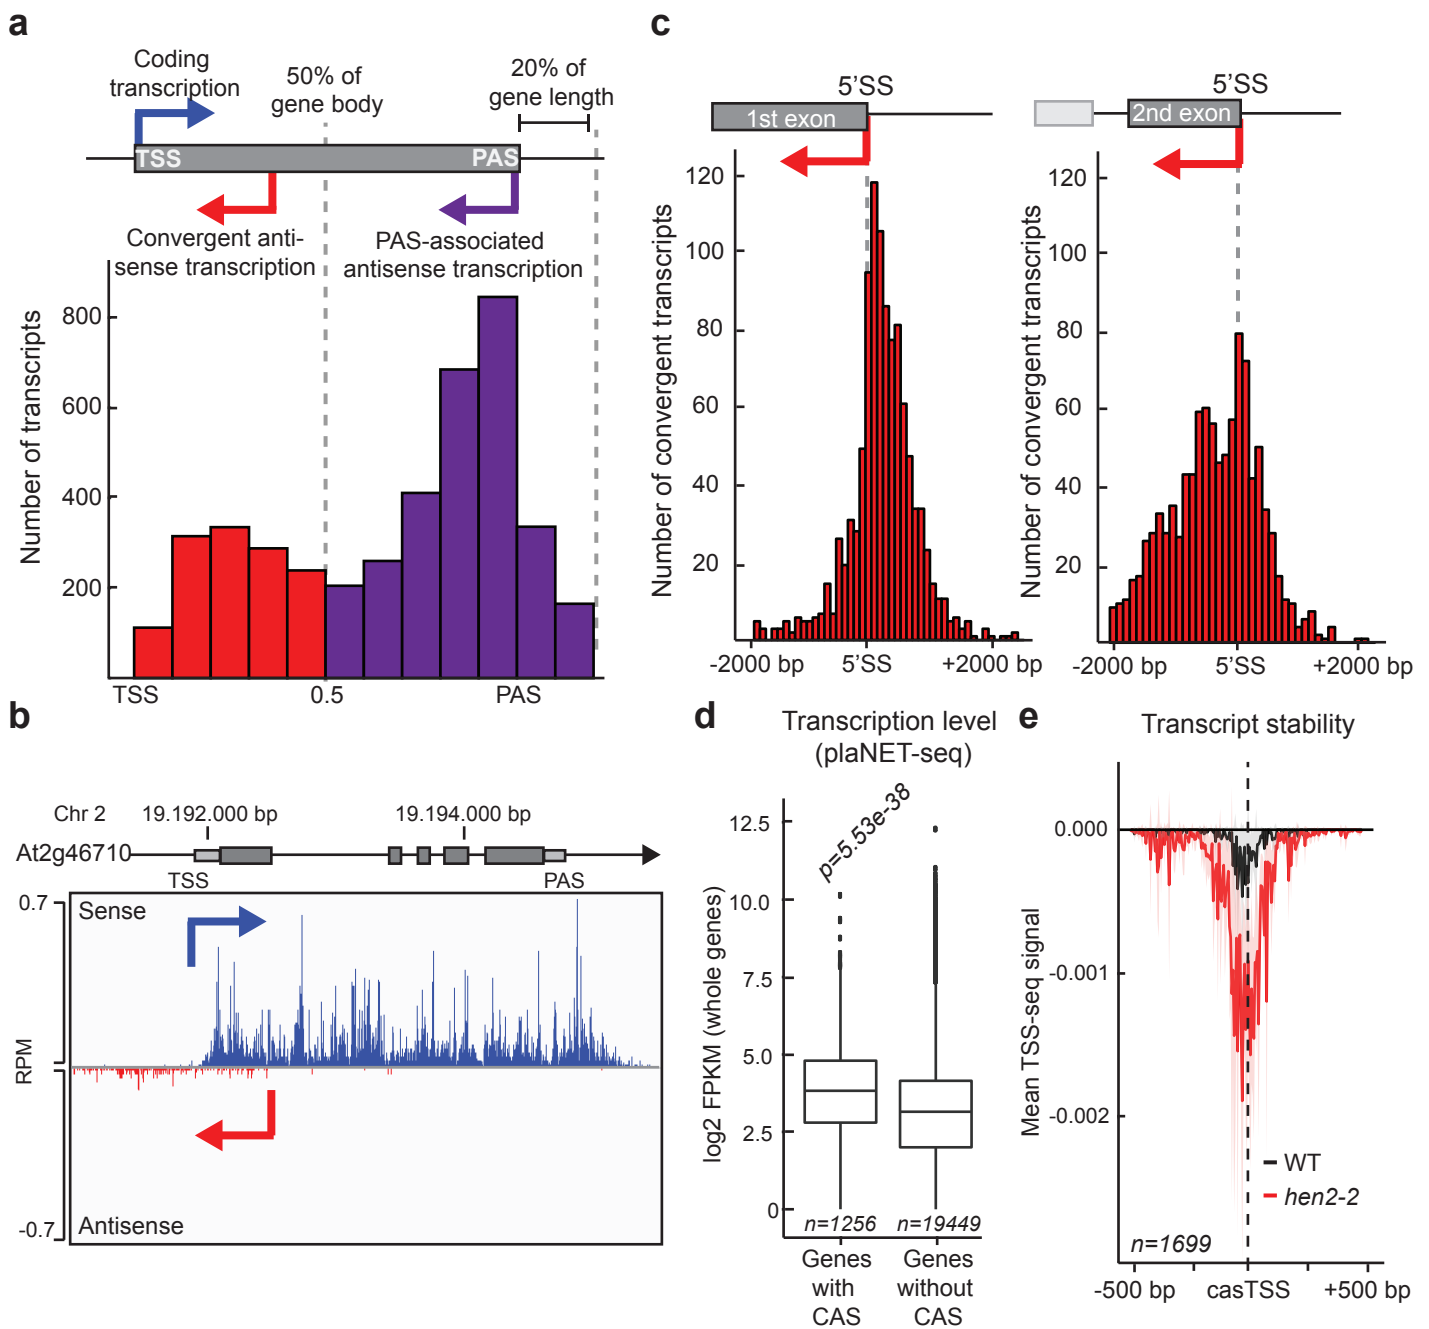

## Figure 4

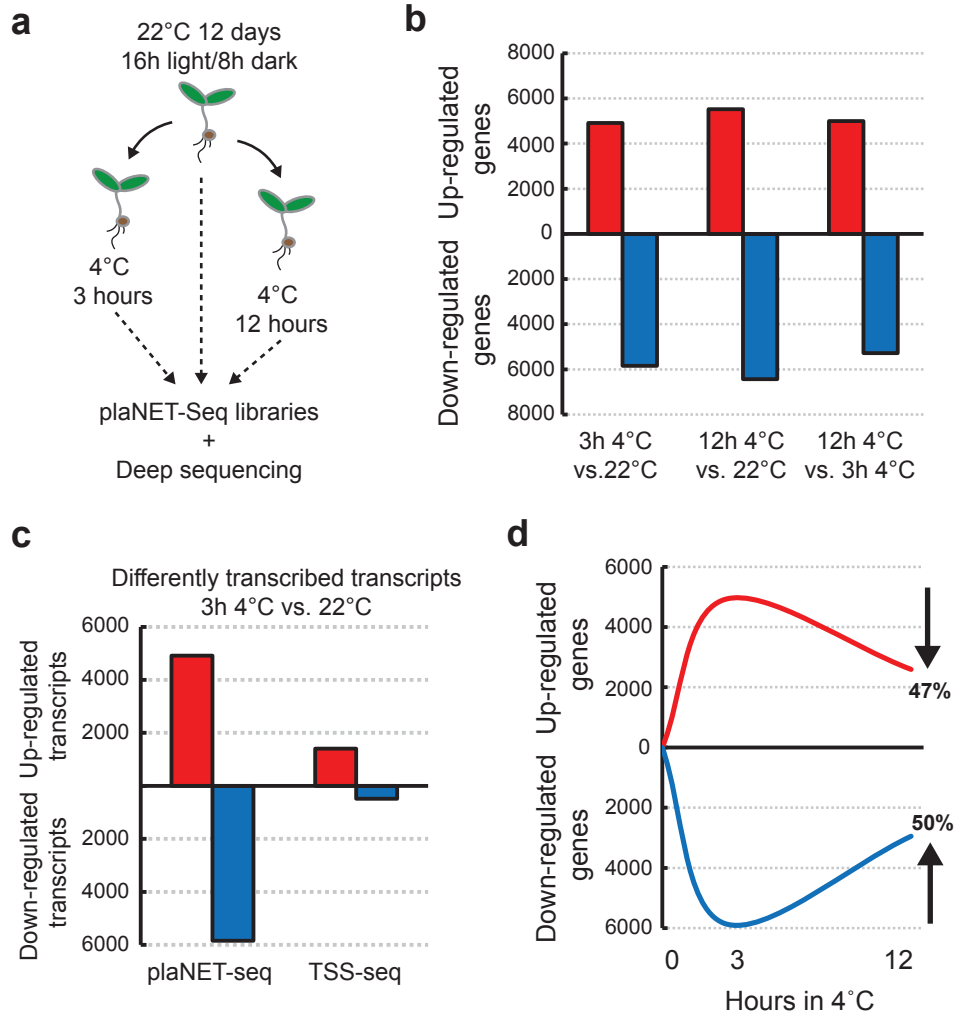

**Figure 5**

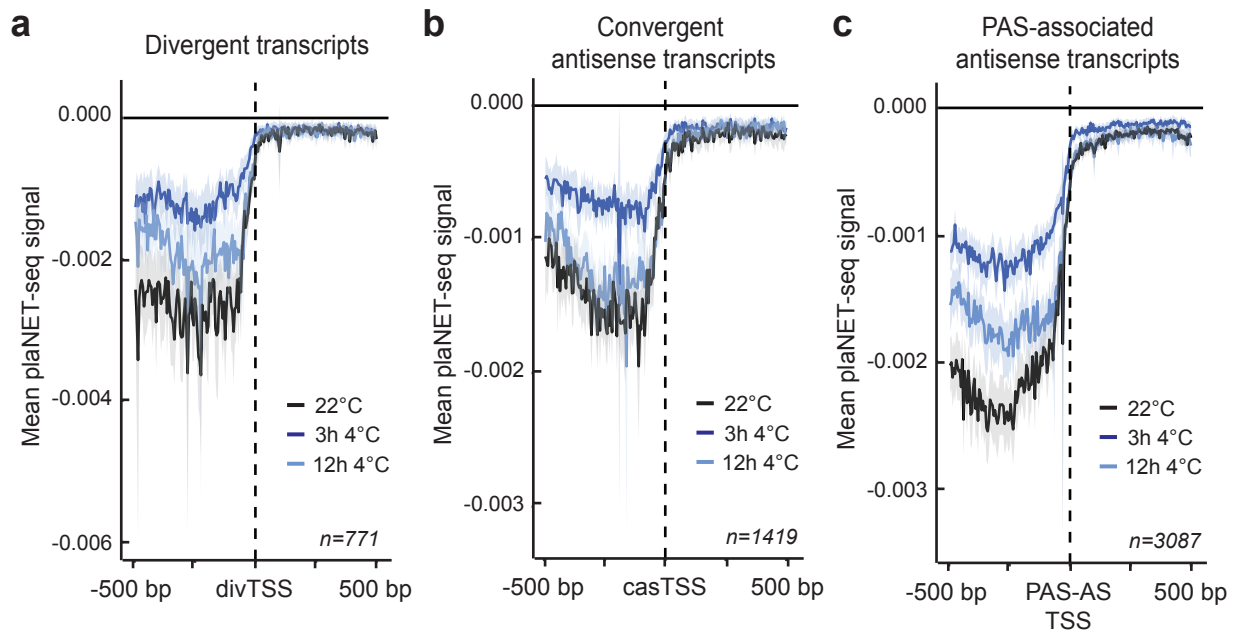



## Figure 6

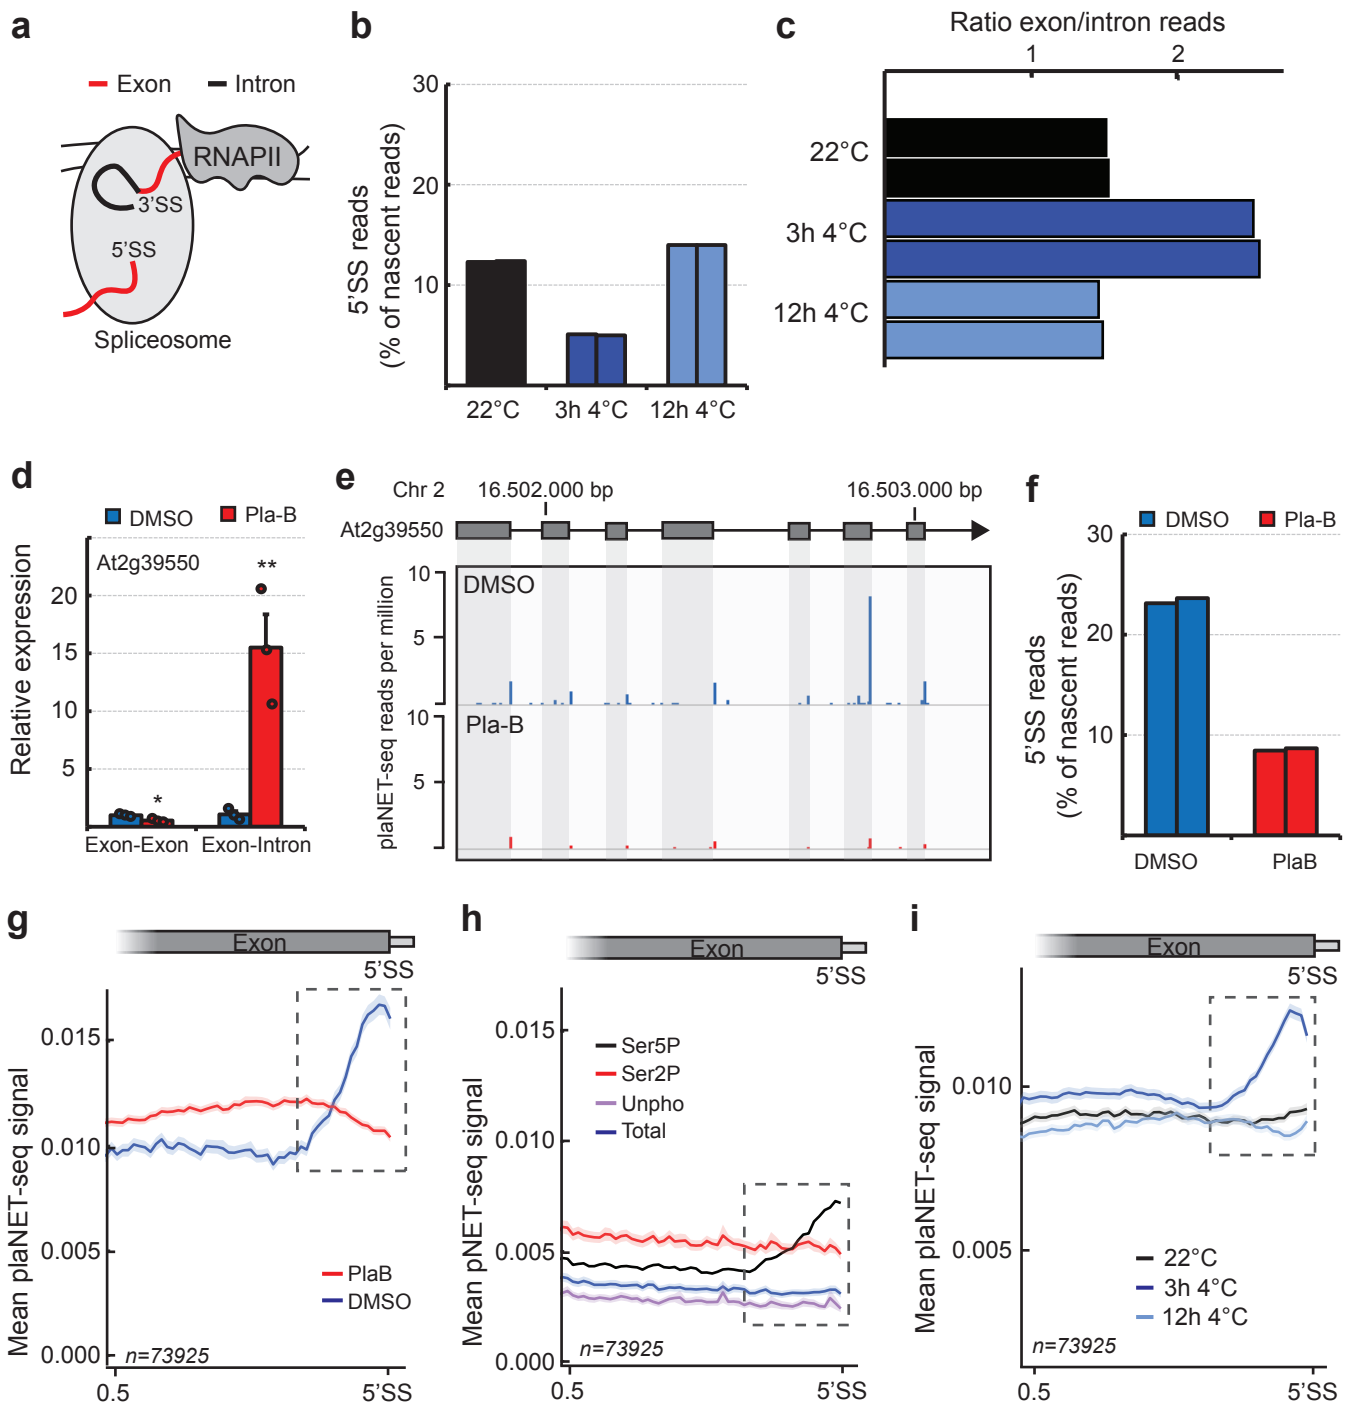

## Figure 7

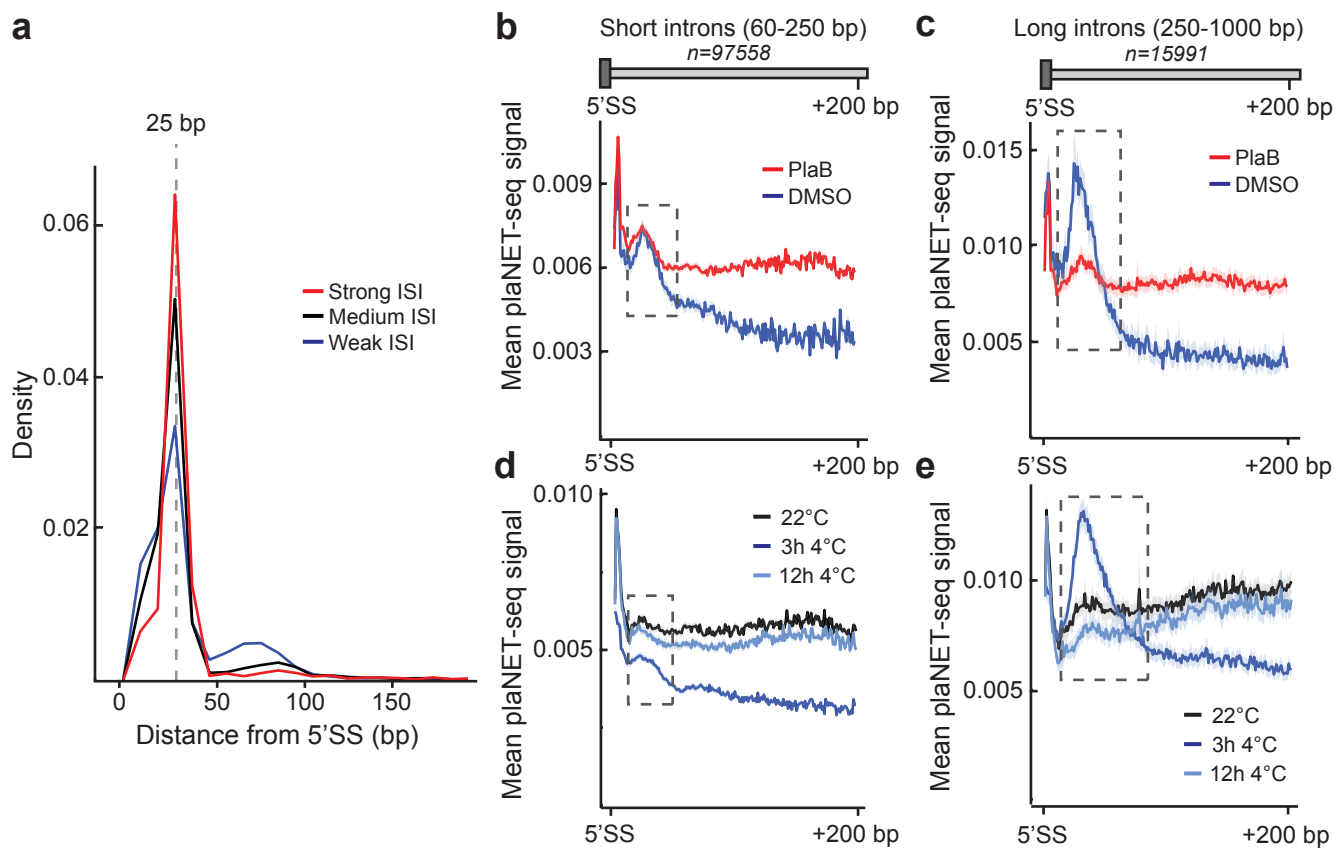

## Figure 8

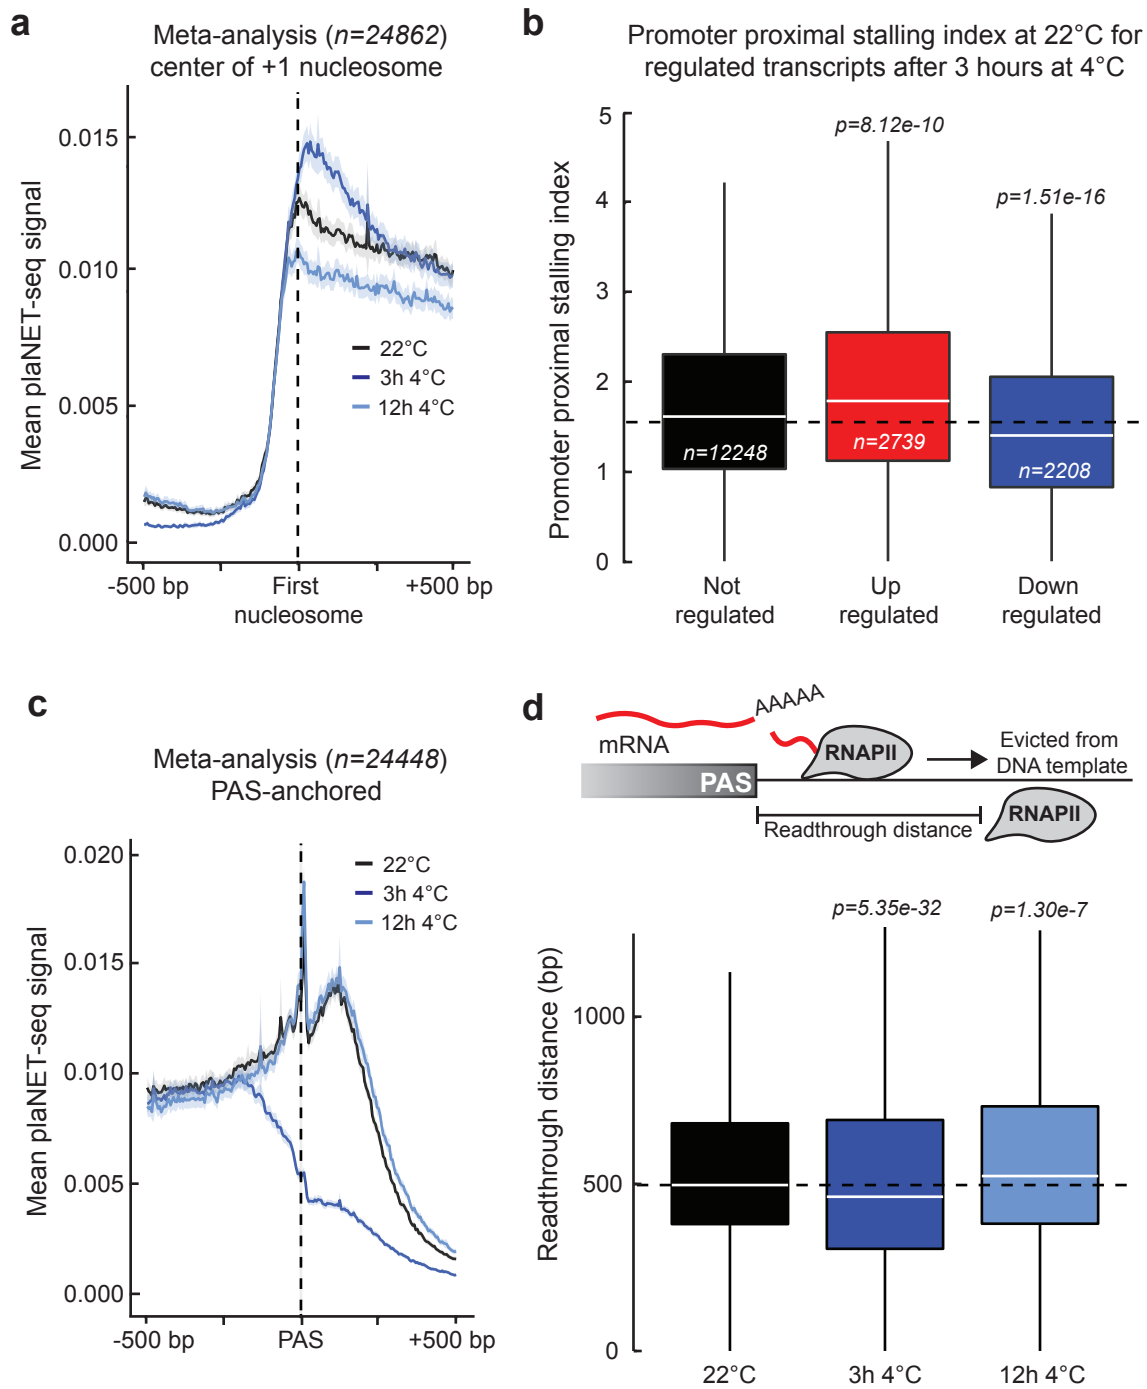

Source: https://www.biorxiv.org/content/10.1101/834507v1.full.pdf
